1 **MiR-505-3p is a Repressor of the Puberty Onset in Female Mice**

2 **miR-505-3p and the puberty onset**

3 Yuxun Zhou, Li Tong, Maochun Wang, Xueying Chang, Sijia Wang, Kai Li and Junhua Xiao\*

4

5 The College of Chemistry, Chemical Engineering & Biotechnology, Donghua University, 2999 North

6 Renmin Road, Songjiang, 200237 Shanghai, China

7

8 \*Corresponding author: Junhua Xiao

9 Address: The College of Chemistry, Chemical Engineering & Biotechnology, Donghua University,

10 2999 North Renmin Road, Songjiang, 200237 Shanghai, China

11 Telephone number: +86-21-6779-2739

12 \*To whom correspondence may be addressed. Email address: [xiaojunhua@dhu.edu.cn](mailto:xiaojunhua@dhu.edu.cn) (JX)

13

14 Data Availability Statement: All relevant data are within the paper and its supporting information files.

15

16 Competing interests: The authors have declared that no competing interests exist.

17

18

19

20

21

22

23        **Abstract**

24        Puberty onset is a complex trait regulated by multiple genetic and environmental factors. In this  
25        study, we narrowed a puberty related QTL down to a 1.7 Mb region on chromosome X in female mice  
26        and inferred miR-505-3p as the functional gene.

27        We conducted ectopic expression of miR-505-3p in the hypothalamus of prepubertal female mice  
28        through lentivirus-mediated orthotopic injection. The impact of miR-505-3p on female puberty was  
29        evaluated by the measurement of pubertal events and histological analysis. The results showed that  
30        female mice with overexpression of miR-505-3p in the hypothalamus manifested later puberty onset  
31        timing both in vaginal opening and ovary maturation, followed by weaker fertility lying in the longer  
32        interval time between mating and delivery, higher abortion rate and smaller litter size. We also  
33        constructed miR-505-3p knockout mice by CRISPR/Cas9 technology. MiR-505-3p knockout female  
34        mice showed earlier vaginal opening timing, higher serum gonadotrophin and higher expression of  
35        puberty-related gene, as well as its target gene *Srsf1* in the hypothalamus than their wild type  
36        littermates.

37        *Srsf1* was proved to be the target gene of miR-505-3p that played the major role in this process.  
38        The results of RIP-seq (RNA Immunoprecipitation-sequencing) showed that SF2, the protein product  
39        of *Srsf1* gene, mainly bound to ribosome protein (RP) mRNAs in GT1-7 cells. The collective evidence  
40        implied that miR-505-3p/SRSF1/RP could play a role in the sexual maturation regulation of mammals.

41        **Author summary**

42        The puberty onset in mammals is a vital biological process that signals the acquisition of  
43        reproductive capacity. The initiation of puberty is triggered by the activation of hypothalamic pulsatile  
44        GnRH surge. The dysregulation of pubertal development shows relevance to later health risks of type 2

45 diabetes, cardiovascular disease, breast cancer and other health disorders. Recent progress indicates  
46 that a lot of genes play a role in the excitatory or inhibitory regulation of GnRH release. However, the  
47 detailed pathway of pubertal timing remains unclear. Our previous studies isolated an X-linked QTL  
48 that was associated with the timing of puberty in mice. In this study, we proved that miR-505-3p was a  
49 female puberty onset regulator based on data from positional cloning, ectopic expression and knockout  
50 mouse models. We also assigned *Srsf1* as the functional target gene of miR-505-3p underlying this  
51 process. The results of RIP-seq showed that SF2, the protein of *Srsf1* gene, preferential bound to  
52 ribosome protein (RP) mRNAs in GT1-7 cells. We propose that miR-505-3p/SF2/RP could play a role  
53 in the sexual maturation regulation of mammals.

## 54 **Introduction**

55 Puberty onset is an essential and complicated physiology process that relies on the activation of  
56 hypothalamic-pituitary-gonadal axis(HPGA).The pulsatile secretion of GnRH hormones from the  
57 specialized neurons in the hypothalamus trigger gonadal hormones secreting cascade that results in the  
58 maturation of sexual behaviors and signal the transition from non-reproductive juvenile into a fertility  
59 competent adult [1, 2]. The dysregulation of pubertal development shows relevance to later health risks  
60 for type 2 diabetes, cardiovascular disease, breast cancer and other health disorders [3].

61 The genetic and environmental factors involved in the regulation of puberty timing have been well  
62 characterized. The mutations in *Gpr54* (a G protein-coupled receptor ) gene could cause autosomal  
63 recessive idiopathic hypogonadotropic hypogonadism (iHH) in human, and the puberty regulating  
64 function of GPR54 was also revealed in mice with complementary genetic approaches [4-6], which  
65 suggested a crucial role of GPR54 and its ligand Kisspeptin in the regulation of puberty.

66 During the last decade, novel central neuroendocrine pathways in the control of puberty have been

67 revealed. In 2017, genome-wide association studies including genotype data of up to ~370,000 women  
68 identified 389 independent signals for age at menarche, ~250 genes were implicated via coding  
69 variation or associated expression[7].The maternal imprinted gene MKRN3 was the first gene  
70 identified with an inhibitory effect on GnRH secretion. It was related with central precocious puberty  
71 by whole-exome sequencing of pedigree samples [8]. System biology strategies revealed that at least  
72 three gene networks might contribute to the puberty onset [9].

73 In our previous studies, we isolated a QTL (quantitative trait locus) on Chromosome X affecting  
74 the vaginal opening in female mice [10]. In this study, We narrowed the QTL down to a 1.7Mb region  
75 by constructing 8 interval-specific congenic strains (ISCSs) between C57/BL6 (B6) and C3H/He(C3H)  
76 mice. Among the genes in this region, miR-505-3p was assumed to be the potential candidate  
77 according to the variation in its flanking sequence and gene expression levels between C3H and B6  
78 mice, as well as its functional annotation. MicroRNAs are endogenous, small non-coding RNAs (~22nt  
79 in length) silencing the gene expression at post-transcriptional level by targeting the 3' untranslated  
80 region (UTRs) of mRNAs. MicroRNAs get involved in various biological processes [11]. Recent  
81 evidence suggested that microRNAs also participated in the precise regulation of puberty onset [12].  
82 MiR-505-3p usually serves as a biomarker of various diseases including primary biliary cirrhosis,  
83 Parkinson's disease and inflammatory bowel disease [13-15]. Zucchi et al detected the downregulation  
84 of miR-505-3p in newborn rat brain in response to the prenatal stress [16]. Moreover, miR-505-3p  
85 was proved to induce apoptosis in MCF7-ADR cells, and functioned as a tumor suppressive miRNA  
86 [17], its first validated target by experiments was the alternative splicing factor/splicing factor2  
87 (ASF/SF2 or SRSF1) [18], which is a regulator of mTOR (the mammalian Target of Rapamycin)  
88 pathway [19], while the activated mTOR signaling could accelerate the vaginal opening in female rats

89 [20]. Such indirect evidence tempted us to clarify the authentic relationship between miR-505-3p and  
90 the mammalian puberty onset regulation.

91 In this study, we conducted overexpression of miR-505-3p in the hypothalamus of prepubertal  
92 female mice through lentivirus-mediated orthotopic injection. We also constructed miR-505-3p  
93 knockout mice (miR-505-3p  $-/-$ ) by CRISPR/Cas9 technology. The impact of miR-505-3p on the  
94 female puberty was evaluated by the measurement of pubertal events and histological analysis in these  
95 genetically modified mice. The results showed that female mice with ectopic expression of miR-505-3p  
96 in the hypothalamus manifested later puberty onset timing, compromised fertility, higher abortion rate  
97 and smaller litter size. While miR-505 knockout female mice showed lightly earlier vaginal opening  
98 and shorter interval time between mating and delivery. *Srsf1* was proved to be the target gene of  
99 miR-505-3p that played the major role in this process. The results of RNA  
100 Immunoprecipitation-Sequencing (RIP-Seq) showed SF2, the protein of *Srsf1* gene, mainly bound  
101 ribosome protein (RP) mRNAs in GT1-7 cells.

102 All these results suggest that miR-505-3p may regulate the puberty onset via modulating the  
103 expression of *Srsf1* gene and RP. They give us insights into a new regulating pathway involving  
104 microRNA, SF2 and ribosome proteins in mammalian puberty onset.

## 105 **Results**

### 106 **MiR-505-3p was identified as a functional candidate gene in the QTL on chromosome X**

107 We have identified a 9.5Mb (2.5cM) QTL that regulates the puberty onset of female mice on  
108 chromosome X in our previous work. To narrow down the QTL further, 8 interval-specific congenic  
109 strains (ISCSs) with intervals within this region of B6 chromosome X were substituted into C3H  
110 background in the N7 generation, in which we recorded the age at VO and body weights of all female

111 mice. Nonparametric tests showed that strain# 1~3, 7 and 8 showed significantly different VO age from  
112 the parental strain C3H, while strain #4~6 didn't. Based on the QTL information and allele distribution  
113 among those strains, we ascertained a shrunk QTL of about 1.6Mb between rs13483770 and  
114 rs299055848 (Fig 1A, S1 Table).

115 There are 19 genes in the QTL region (rs13483770~rs299055848) on chromosome X, including  
116 seven pseudogenes, four ncRNAs, seven protein-coding genes, and one microRNA gene. To screen for  
117 the candidate gene(s), we referred to Sanger database to search for the DNA sequence variations  
118 between C3H and B6 mice in this region. Data showed that there were no SNPs, short indels or  
119 structural variants lying in the coding region, 5' or 3' UTR of these genes except for mir-505, as  
120 sensible variations of 5 consecutive SNPs existed near 5' upstream region of mir-505 gene (S2 Table).  
121 To confirm the results from Sanger database, we did DNA sequencing for the interested regions of the  
122 19 genes, and found no exceptions. We compared the mRNA expression levels of the seven  
123 protein-coding genes in HPG axis between B6 and C3H female mice in order to find out the  
124 differentially expressed genes. Six of them were expressed in mouse HPGA except for the gene of  
125 Gm7073, but they made hardly significant differences in the amount of accumulation between the two  
126 strains, especially at the hypothalamus or pituitary (Fig 1B). On the other hand, miR-505-3p of B6 was  
127 expressed higher in the hypothalamus than that of C3H (Fig 1C) at postnatal 15 days, and lower in the  
128 pituitary and ovary at postnatal 45 days. We investigated the temporal and spatial expression pattern of  
129 miR-505-3p in B6 female mice, and found that miR-505-3p was most abundant at hypothalamus in the  
130 four tested tissues including pituitary, ovary and muscles (Fig1D); it reached its peak value of  
131 expression at neonatal period (PD5) and decreased gradually afterwards (Fig1E), which implied its  
132 inhibiting role in the sexual maturation process. The integrated evidence suggested that miR-505-3p

133 deserved further investigation as a functional candidate gene.

134 We constructed a GT1-7 cell line with stable overexpression of miR-505-3p named pGT1-7. In  
135 pGT1-7 cells, the expression level of miR-505-3p increased by 1500 times than the GT1-7 cells(S1  
136 Fig) . We compared the expression profiling between pGT1-7 and negative control group GT1-7  
137 (transfected with pLenti6.3-nc lentivirus) on DNA microarray, and found that some important puberty  
138 related genes, including *Kiss1* and *GnRH*, decreased in pGT1-7 cells. These results were confirmed by  
139 qRT-PCR assay (Fig1F), implying that miR-505-3p may participated in the puberty onset regulation  
140 through the inhibition of puberty related genes.

141 **Ectopic expression of miR-505-3p in the hypothalamus influences the puberty onset timing and**  
142 **fertility of female mice**

143 In order to investigate the influence of miR-505-3p on the puberty timing in female mice, we made  
144 miR-505-3p overexpressed in the hypothalamus of C57BL/6 (B6) female mice at postnatal 15 days by  
145 lentivirus-mediated orthotopic injection. In the window of post injection 5 to 40 days, the hypothalamic  
146 miR-505-3p overexpression maintained at a high level, reaching the peak at 10 days after injection  
147 (miR-505-3p-LV-treated=24.89±3.319, saline-treated=1.016±0.08129, untreated=1.096±0.2130,  
148 P<0.0001) . (S2 Fig)

149 After injection, the mice were weighted once every other day, and the miR-505-3p-LV-treated  
150 (abbreviated as LV-treated) female mice showed significant growth retardation compared with the  
151 untreated ones (Figure 2A). The vaginal opening in untreated mice were 2 days earlier than the  
152 LV-treated ones (P<0.01) (Figure2B).

153 After sexual maturation, the female mice were mated with wild-type experienced male mice to evaluate  
154 the long-term impact of hypothalamic miR-505-3p overexpression on reproduction. The LV-treated

155 female mice needed more time to procreate and had smaller newborn litters compared with the control  
156 ones, the death rate of offspring before weaning increased in LV-treated mice as well (Figure 2C and  
157 2D). The Hematoxylin-eosin (HE) stained ovarian sections at various time showed the delay of the  
158 formation of the preovulatory follicles and corpora lutea (CLs) in LV-treated female mice compared  
159 with untreated ones, which provided explanation for the later birth of newborn offspring in LV-treated  
160 mice, and the reduced number of newborn offsprings could be attributed to the deficiency or reduced  
161 number of preovulatory follicles (Figure 3).

162 We found higher death rate of litters in LV-treated groups, and the rate of abortion in LV-treated  
163 groups was 2.5 -fold higher than the two control groups. About 8 percent of LV-treated mice were  
164 sterile in contrast with the control groups, in which no sterile mice were found (Figure 4A). The FISH  
165 (fluorescence in situ hybridization) results of the brain section showed that the sterile female mouse had  
166 stronger fluorescence signals near the third ventricle than the signals of its counterparts which had four  
167 or eight litters, respectively. This finding suggested the level and the location of miR-505-3p  
168 overexpression in the hypothalamus may influence the fertility phenotype of female mice (Figure 4B) .

### 169 **MiR-505-3p knockout mice showed an advanced onset of puberty and abnormal reproductive** 170 **phenotypes**

171 With the help of CRISPR/Cas9 technology, we obtained 41 living offsprings, and 16 of them carried  
172 mutations in mir-505 cDNA region on their genome detected by DNA sequencing. Two pups with the  
173 largest deletion (-17bp and -23bp, respectively) adjacent to the 5' end of miR-505 (S3 Fig) and in the  
174 coding region of mature miR-505-5p were kept as founders to generate DKO miR-505-3p  $-/-$ ), SKO  
175 miR-505-3p  $+/-$ ) and wild type mice for puberty onset trait investigation by backcrossing to B6 mice.  
176 In DKO mice, the expressing level of miR-505-3p could hardly be tested, while in SKO mice, the



177 expressing level of miR-505-3p decreased by approximate half ( S4 Fig). In female knockout mice, we  
178 observed an increased growth rate and a larger body weight than wild type mice (Fig 5A), 3.57d and  
179 3.87d advance in vaginal opening in SKO and DKO mice (Fig 5B), respectively. At PND45, the mass  
180 of reproductive system was larger in knockout mice, indicating advanced sexual development in  
181 knockout mice (Fig 5C).

182 We then analyzed serum levels of the pituitary gonadotropins luteinizing hormone (LH) and  
183 follicle-stimulating hormone (FSH), and the results showed a remarkable increase in female knockout  
184 mice (Fig 5D). Moreover, the size of the litter was larger in knockout mice than wild type, and  
185 heterozygous knockout mice showed more dystocia in female mice and more dead off springs at 48h  
186 (Table 1). Hematoxylin-eosin stained ovarian sections of miR-505-3p knockout mice showed more  
187 corpus luteum (Fig 5E). *Srsfl*, *Kiss1* and *Gnrh* in hypothalamus of miR-505-3p knockout mice and  
188 wild mice at different postnatal days were also detected, and the results showed knockout mice had  
189 higher expression levels (Fig. 6).

#### 190 ***Srsfl* was proved to be a target gene of miR-505-3p in GT1-7 cell line**

191 We performed the Gene ontology analysis on the gene expression profilings data from the  
192 microarray detection between pGT1-7 and GT1-7 cells. 1490 genes were upregulated and 604 genes  
193 were downregulated in the pGT1-7 cells. Among these genes, we screened for the miR-505-3p target  
194 genes on the TargetScan website. Four predicted genes, including *CD97*, *Hmbgl*, *Cadm1* and *Srsfl* with  
195 high expression level in GT1-7 cells were assumed as the candidate target of miR-505-3p. Dual  
196 luciferase reporter assay in HEK293 cells were performed to test the inhibitory effect of miR-505-3p  
197 by binding to their 3'UTR. The results indicated that the other three genes except for *CADM1* could be  
198 the target genes of miR-505-3p (S5 Fig A, B). Integrated with their functional annotation, *Srsfl* was

199 selected preferentially for further investigation. Given that SF2 was proved to be a regulator of mTOR  
200 signaling, we analyzed the phosphorylated status of S6K in pGT1-7 cells, but the amount of p-S6K  
201 made no difference between GT1-7 and pGT1-7 cells (S5 Fig C).

202 The accumulation of SF2 protein was less in pGT1-7 cells than in GT1-7 cells (Fig.7A). Knocking  
203 down *Srsf1* expression in GT1-7 by shRNA inhibited the expression of *Kiss1* and *Gnrh* simultaneously.  
204 When the expression of *Srsf1* was rescued in pGT1-7 cells with *Srsf1* steadily overexpressed, the  
205 expression level of *Kiss1* and *Gnrh* increased (Fig.7B). These results indicated that miR-505-3p may  
206 inhibit the expression of puberty-related genes through *Srsf1*.

207 Moreover, *Srsf1*, *Kiss1* and *Gnrh* in hypothalamus of miR-505-3p knockout mice and wild mice at  
208 different postnatal days were also detected, and the result showed knockout mice had higher expression  
209 levels (Fig. 7C).

#### 210 **RIP-seq results showed SF2 mainly bound to RP mRNAs in GT1-7 cell line**

211 RNA immunoprecipitation sequencing (RIP-seq) was used to identify RNAs which bound to SF2  
212 in GT1-7 cell line. The SF2 protein and its bounding RNAs were pulled down by SF2 specific  
213 antibody, and the RNA component was sequenced by next generation sequencing. We pulled down  
214 IgG protein and its bounding RNAs as one control sample, and the RNA extracted from GT1-7 was  
215 another control sample. The RNA-seq data of the SF2 pull down sample was compare to the two  
216 control data separately, and the two comparing results were highly consistent, SF2 protein mainly  
217 bound ribosome related mRNAs in the GT1-7 cell (Table 2).

218 We performed the KEGG analysis on the transcriptome data compared pGT1-7 with GT1-7 cell.  
219 The result showed ribosome and ribosome biogenesis in eukaryotes pathway were both affected in  
220 pGT1-7 cell line (Fig. 8).

221 **Discussion**

222 Genetic strategies, such as positional cloning and association study, can be powerful tools to  
223 reveal the functional genes underlying the complex traits [10, 21-23]. We took the advantage of mouse  
224 models to make interval-specific congenic strains (ISCS) between C3H/He and C57/BL6 mice to  
225 finemap the QTLs related to the puberty onset and then reveal the candidate gene according to the  
226 sequence variation, expression differentiation and functional connection. To our knowledge,  
227 miR-505-3p is the first microRNA which was found by positional cloning as a puberty regulator in  
228 female mice.

229 Considerable progress has been made to decipher the molecular foundation of the pubertal timing  
230 [24-26]. Especially some studies revealed the potential epigenetic regulatory role of miRNAs and  
231 lncRNAs in female puberty[27]. Okabe et al indicate that the knockout of miR-200b and miR-429 can  
232 induce reduced fertility in female mice<sup>[28]</sup>.Zhu et al show the variation in Lin28/let7 pathway can  
233 change the body size and onset of puberty in mice[29]. Furthermore, miR-132, miR--9 and miR-145  
234 are also involved in the pubertal timing owing to their potential regulatory role of c-myc and  
235 Lin28<sup>[30,31]</sup>. In 2016, Messina et al. reported a microRNA switch that controlled the rise of  
236 hypothalamus GnRH production before puberty in mice [32]. They provided direct evidence that the  
237 increasing expression of miR-200/429 and miR-155 in GnRH neurons during the infantile period lifted  
238 the repressive control of GnRH expression, by repressing ZEB1 and CEBPB, respectively [32]. These  
239 results suggested the existence of a multilayered and interconnected array of miRNAs and their target  
240 genes that control the puberty timing. Our results shows the overexpression of miR-505-3p in the  
241 hypothalamus can cause the delay of puberty timing and reduced fertility in female mice, and the  
242 results from miR-505-3p knockout mice supported the deduction, which could be a new member of this

243 regulating array.

244 We constructed a miR-505-3p ectopic expression female mouse model by lentiviral delivery.  
245 Lentiviral vector as a versatile tool has been accessible to transfect post-mitotic neurons and induces  
246 substantial, long-term transgene expression<sup>[33-35]</sup>. In our experiment, the miR-505-3p overexpression in  
247 the mouse hypothalamus directed by lentivirus reached the peak (about 25 times as the control) on the  
248 tenth day after injection and continued for at least 40 days (though declined to 8 times of the control),  
249 which provided an ideal window to investigate the puberty onset and reproductive actions of the female  
250 mice affected by the microRNA. Besides reverse transcription and real-time PCR, we performed in situ  
251 hybridization for miR-505 detection using improved LNA-probes with high specificity and sensitivity.  
252 The expression pattern of hypothalamic miR-505-3p detected by in situ hybridization can be used to  
253 further elucidate the relationship between miR-505-3p function and the location of miR-505-3p in the  
254 hypothalamus. Actually we have observed some connections between the injecting site and the  
255 phenotypic distinction.

256 Finding out the target gene of miR-505-3p underlying the puberty onset in female mice can help  
257 to tell the regulation mechanism of this complex trait. In our previous work, we identified one of the  
258 important functions of miR-505-3p as that it was a crucial regulator for axonal elongation and  
259 branching through modulating autophagy in neurons [36]. Atg12 was testified to be the key target gene  
260 of miR-505-3p in this process, as its protein product ATG12 (autophagy-related 12) was an essential  
261 component of the autophagy machinery during the initiation and expansion steps of autophagosome  
262 formation. However, we did not find the influence of miR-505-3p overexpression on the amount of  
263 ATG12 in GT1-7 cells, either in the mRNA expression profiling data or qRT-PCR detection, which  
264 could be due to the different cell types we used. Autophagy is more active in neurons than in cultured

265 cells [37, 38], and the autophagy-related proteins in neurons could be not as sensitive to the microRNA  
266 modulation as in the cultured GT1-7 cells. We found that when cultured in serum reduced medium, the  
267 target gene of miR-505-3p became more sensitive to microRNA regulation in GT1-7 cells [39], which  
268 implied that the decreased velocity of the protein synthesis under malnourished condition can help the  
269 fine tuning of microRNAs on their targets. *Srsf1* is the first experimentally validated target gene of  
270 miR-505-3p, and it was also a regulator of mTOR pathway, which was reported to participate in the  
271 VO modulation in rats [20]. However, in miR-505-3p overexpressing pGT1-7 cells, the amount of the  
272 marker of the activated mTOR signaling phosphorylated S6K was not affected, which implied that the  
273 inhibition of the *Srsf1* expression by miR-505-3p did not influence the mTOR signaling in GT1-7 cells.  
274 *Srsf1* is the archetype member of the SR (Serine an Arginine rich protein) family of splicing regulators  
275 and has multiple functions in the cell nucleus and cytoplasm. Moreover, *Srsf1* is also a proto-oncogene  
276 in cell malignant transformation [40, 41]. SF2 could bind to ribosomal proteins and help in mRNA  
277 stability, transport, intracellular localization, and translation [42]. Ribosomal proteins play independent  
278 key roles in the regulation of apoptosis, multidrug resistance and carcinogenesis [43,44], RPL22 can  
279 inhibit Lin28B, RPS7 regulates PI3K/AKT and MAPK [45]. Our RIP results showed that SF2 bind to  
280 the mRNA of ribosomal proteins preferentially which had not been reported before. The biological  
281 significance of this selectivity has not been clarified though, it encourages us to assume that  
282 miR-505-3p may affect the independent roles of ribosomal proteins by inhibiting SF2 in GT1-7 cells,  
283 and the output of these series effects is the downregulation of puberty related genes. The potential  
284 relationship between RP and the puberty development needs further elucidation. The function of  
285 miR-505-3p as a puberty regulator in female mice has been revealed by cell and animal model, but the  
286 underling mechanism still requires further researches.

287 **Materials and methods:**

288 **Fine mapping of the puberty-related QTL on Chromosome X in mice**

289 In our previous work, a significant puberty-related ChrX QTL of 2.5 cM was found by genome  
290 scanning, in a panel of 10 modified interval-specific congenic strains (mISCSs) in C57/BL6 and  
291 C3H/He mice [10]. In this study, the mice of the strain carrying the QTL were backcrossed with C3H  
292 mice. The resulting male F2 mice holding at least one recombination at the special interval were chosen  
293 and then backcrossed with female C3H to obtain N2 generation. The female N2 continued to mate with  
294 male C3H to generate N3 generation. N3 male mice holding only one recombination at the target  
295 interval were selected and continued to backcross with female C3H to generate N4. N4 mice siblings  
296 were crossed until N7 generation. At last, the age at VO of all female mice of N7 progenies was  
297 recorded. All modified ISCSs were verified by genotyping for the genetic markers on chromosome X.  
298 All animal procedures were approved by the Animal Ethics Committee of Donghua University, and all  
299 experiments were conducted in strict accordance with the National Institutes of Health Guide for the  
300 Use of Laboratory Animals.

301 **DNA Extraction and Sequencing**

302 DNA Extraction from the tail tip was performed using a DNA Extraction Kit (Tiangen, China),  
303 followed by the instructions provided by the manufacturer. All gene sequence data were from  
304 NCBI database. And the primers were designed by Primer3 (<http://frodo.wi.mit.edu/primer3/>) and  
305 synthesized by Shanghai Sangon Biotech Ltd. PCR was performed in 15  $\mu$ L reaction mix  
306 containing 3  $\mu$ L DNA template, 200 nM of each PCR primer, 0.25 mM of each dNTP, 3 nM  
307 MgCl<sub>2</sub>, 1.5  $\mu$ L 10 $\times$ PCR Buffer and 1 U Hot start DNA Polymerase (Tiangen, China) covered by  
308 mineral oil. The reaction was carried out at 95 $^{\circ}$ C for 15 min, followed by 95 $^{\circ}$ C 30 sec, 55 $^{\circ}$ C 0.5

309 min, 72°C 1 min, 35 cycles. The purified PCR products were sequenced by 3730XL sequencing  
310 instrument (ABI, USA).

### 311 **SNP database querying between C3 and B6 mice**

312 All SNPs between C3 and B6 mice in the QTL region (rs13483770~rs299055848) on chromosome X  
313 were queried from Mouse Genome Project in Sanger Database  
314 (<http://www.sanger.ac.uk/science/data/mouse-genomes-project>).

### 315 **qRT-PCR**

316 Total RNA from hypothalamus or 10<sup>6</sup> cells was isolated using Trizol reagent (Invitrogen, USA) in line  
317 with the manufacturer's protocol. 1ug of total RNA was reverse-transcribed with oligo-dT (for mRNA  
318 detection) or microRNA specific primer (for microRNA detection) by RevertAid First strand cDNA  
319 synthesis Kit (ThermoFisher, USA). Real-time PCR was performed using SuperReal PreMix Plus  
320 (TIANGEN, Beijing, China) on 7500 Real-time PCR System (Applied Biosystems) and normalized to  
321 *Actb* (for mRNA) or miR-16 (for microRNA). All reactions were run in triplicate and included no  
322 template control for each gene. All PCR primers were listed in S3 Table.

### 323 **Generation of hypothalamic miR-505 overexpressing mice**

324 C57/BL6 (B6) inbred mice were purchased from Shanghai SLAC Laboratory Animals Co.LTD  
325 (Shanghai, China). The miR-505-3p carrying lentivirus delivery was performed on female mice at  
326 postnatal 12-15d weighted at 5.2-5.6 g. After 1% sodium pentobarbital anaesthesia, mice were fixed on  
327 stereotaxic apparatus (STOELTING, USA). According to Paxions et al<sup>[21]</sup>, The hypothalamic  
328 stereotaxic coordinates were carried out relative to the bregma (anteroposterior [AP]=-1.53mm and  
329 lateral [L]=±0.24mm) and to the skull (dorsoventral [DV]=-5.3mm). The injection of lentiviral  
330 preparation (2.83E+08 IU/ml, 900 nl per sample) was at the rate of 30 µL/min. Saline were also

331 injected to the female mice at the same condition to be used as controls. After injection, the mice were  
332 kept at 37°C till recovered from anesthesia. Afterwards, the mice were put back to their mothers for  
333 further investigation.

#### 334 **Cryostat section**

335 Mice were under 1% sodium pentobarbital anesthesia and perfused by 0.9% saline. When the color of  
336 liver and lung become pale, saline was replaced by 4% paraformaldehyde to fix the tissues. Then the  
337 brains and ovaries were taken out and kept in paraformaldehyde solution at 4 °C overnight. The fixed  
338 brains and ovaries were dehydrated by glucose solution and cut into sections using Cryotome  
339 (Thermo,USA). The thickness of brain and ovary sections was 15µm and 20µm, respectively. The  
340 sections were attached to slides which were pretreated with potassium dichromate and embedded in  
341 polylysine. Slides were stored at -80 °C until objected to FISH and HE staining, respectively.

#### 342 **In situ hybridizations**

343 Brain sections were taken out from -80 °C and dried at room temperature for at least 10 min. The  
344 sections were fixed by 4% paraformaldehyde and pretreated withj Triton x -100 and Proteinase K to  
345 improve the tissue permeability. After pre-hybridization, sections were hybridization with diluted  
346 digoxigenin (DIG)-labeled LNA probes for miR-505-3p, (5'-AGAAAACCAGCAAGTGTGACG-3')

347 at 55°C overnight. Then the sections were washed and incubated with Horseradish Peroxidase (HRP)  
348 conjugated anti-DIG antibodies(Abcam,Shanghai,China) at 4.°C overnight. The fluorescent signals  
349 were amplified using TSA™Cyanine 5 System (PerkinElmer,USA) and detected by inverted phase  
350 contrast fluorescence microscope (Olympus, Japan).

#### 351 **Measurement of pubertal events and fertility analysis**

352 The animals were housed under the specific pathogen free (SPF) standard conditions with a 12 h



353 light/dark cycle and adequate water and food. Injected female pups were caged with their mothers  
354 again and weighed every two days. After weaned at postnatal 21d, the mice were examined daily for  
355 the vaginal opening. They were mated with fertile male mice at the age of 8 weeks at the ratio of two to  
356 one. Female mice with drastic body weight gaining were assumed to be pregnant and were separated  
357 from male mice into a single cage. The interval time between mating and delivery was recorded.  
358 Female mice that failed to be pregnant for more than one month were regarded as infertile. The rate of  
359 infertility in female mice and the death rate of newborns were calculated. Mice with vacant virion or  
360 saline injected were used as control.

#### 361 **Hormone detection**

362 Serum LH and FSH were extracted by mouse orbital blood sampling. The detection of LH or FSH was  
363 performed using Mouse LH ELISA KIT or Mouse FSH ELISA KIT(Elabscience,Wuhan,China)  
364 according to manufacture's procedures, respectively. The standard curve was plotted by CurveExpert  
365 1.4 software, which was also used to calculate the concentration of LH and FSH referring to the  
366 standard curve.

#### 367 **Histological analysis**

368 Ovarian sections were taken out from -80 °C and dried for at least 10 minutes. Then the sections were  
369 dehydrated by ethanol and stained by hematoxylin and eosin (HE). The morphology of ovaries was  
370 detected by light microscope (Olympus, Japan).

#### 371 **Generation of miR-505 knockout mice**

372 The miR-505 knockout mice were generated in CRISPR/Cas9 technology by The Animal Facility of  
373 Institute of Neuroscience, Chinese Academy of Sciences. Female B6 mice were superovulated using  
374 pregnant mare serum gonadotropin (PMSG) and were injected with human chorionic gonadotropin

375 (HCG) after 48 h. The superovulated female mice were mated with B6 stud males, and fertilized eggs  
376 were collected from their oviducts after 36 hours. Two sgRNAs were designed to guide Cas9 targeting  
377 the pre-miR-505 locus (S1 Fig). A mixture of transcribed Cas9 mRNA and sgRNA was microinjected  
378 into zygotes of B6 mouse. The injected zygotes were transferred into the uterus of pseudopregnant  
379 female mice immediately after injection. The pregnant mice were housed in standard cages on a 12 h  
380 light/dark cycle with *ad libitum* access to food and water till delivery.

381 The pups were taken by tail clips and their DNAs were extracted for sequencing. Pups with large  
382 deletions in pre-mir-505 region were reserved as founders. The generated male and female founders  
383 were mated with wild-type B6 mice at the age of 40 days. The heterozygote F1 mice were self-crossed  
384 to generate double knockout (DKO), single knockout (SKO) and wild type mice for further puberty  
385 events study. The resulting female mice were genotyped by PCR detection with the primers, forward:  
386 5'-AAACCAGCAAGTGTTGACGC, reverse: 5'-CCCTGTTTGTCACCTGCAGA, The lengths of  
387 the PCR products were 120bp for wild type, 103bp, 120bp and 97bp, 120bp for heterozygous, and  
388 97bp and 103bp for homozygous knockout mice.

#### 389 **Construction of miR-505-3p stable over-expressed and *Srsf1* knockdown GT1-7 cell line**

390 The double strand DNA sequence of miR-505-3p was cloned into the pLenti6.3/V5-DEST lentiviral  
391 expression vector (Invitrogen, USA). The target sequence of shRNA for *Srsf1*  
392 (5'-GCCCAGAAGTCCAAGTTAT-3') and non-specific shRNA (5'-TTCTCCGAACGTGTCACGT-3')  
393 were synthesized and cloned into the PLKD-CMV-R&PR-U6-shRNA lentiviral expression vector. The  
394 resulting lentivirus vectors were packaged into virions by Obio Technology Co. LTD (Shanghai,  
395 China). The virions were used to infect GT1-7 cells. Cells were seeded 100000 cells per well in  
396 twenty-four-well plate and cultured in DMEM medium with 10% FBS (Gibco, USA). After 4 days of

397 transfection, cells were selected under antibiotics according to the vector's resistances for 14 days.

398 After 10 days of expansion without antibiotics, the surviving cells were harvested for further

399 investigation. GT1-7 cells with miR-505-3p overexpression were named as pGT1-7.

400 We used GeneChip Mouse Transcriptome Assay 1.0 (Affymetrix, USA) to get the transcriptome data

401 of pGT1-7, and GT1-7 as the control. Differential expressed genes were used to perform KEGG

402 analysis based on Kyoto Encyclopedia of Genes and Genomes database.

### 403 **Cell culture and RIP-seq**

404 GT1-7 cells are immortalized cell lines derived from mouse hypothalamic neurosecretory neurons

405 which provide an ideal model system for study of that regulate reproduction as their similarity to

406 GnRH neurons, such as the synthesis, processing, and pulsatile secretion of GnRH

407 (gonadotropin-releasing hormone)[47]. GT1-7 cells applied in this study were kindly provided by

408 Professor Xiaoying Li of Shanghai Clinical Center for Endocrine and Metabolic Diseases, Shanghai

409 Jiaotong University suggested by Dr. Pamela Mellon at University of California, San Diego. We

410 performed RNA immunological precipitation (RIP) assays followed by high-throughput sequencing in

411 SF2 pulldown of GT1-7 cell, IgG pulldown and total RNA as the control. Briefly, after cell lysis, 10%

412 of sample removed for input stored at -80°C until ready to perform RNA purification. The input sample

413 is used to calculate RIP yields, and may also be used to evaluate the quality of the RNA. Add RNA

414 binding SF2 protein-specific antibody or negative control IgG to supernatant. Incubate with rotation at

415 4°C for overnight. Add washed protein A+G Agarose to each IP sample and incubate with rotation at 4

416 °C for 2 hours, then wash off unbound material and remove supernatants. RNAs bound to

417 RNA-binding protein were purified with Trizol and sequenced by NGS.

### 418 **Acknowledgments**

419 We appreciate Professor Xiaoying Li in Shanghai Clinical Center for Endocrine and Metabolic  
420 Diseases, Shanghai Jiaotong University for providing GT1-7 cells. We also thank Yu Li and Li Chen  
421 for help doing some experiments, Fuyi Xu for the assistance of data analysis, and Xiaoning Li for the  
422 assistance of manuscript writing.

## 423 **References**

- 424 1. Holder MK, Blaustein JD. Puberty and adolescence as a time of vulnerability to stressors that alter  
425 neurobehavioral processes. *Front Neuroendocrinol.* 2014;35(1):89-110. doi:  
426 10.1016/j.yfrne.2013.10.004.
- 427 2. Sisk CL, Foster DL. The neural basis of puberty and adolescence. *Nature Neuroscience.*  
428 2004;7:1040. doi: 10.1038/nn1326.
- 429 3. Day FR, Perry JR, Ong KK. Genetic Regulation of Puberty Timing in Humans.  
430 *Neuroendocrinology.* 2015;102(4):247-55. doi: 10.1159/000431023.
- 431 4. Kostrzewa E, Kas MJ. The use of mouse models to unravel genetic architecture of physical activity:  
432 a review. *Genes Brain Behav.* 2014;13(1):87-103. doi: 10.1111/gbb.12091.
- 433 5. Seminara SB, Messenger S, Chatzidaki EE, Thresher RR, Acierno Jr JS, Shagoury JK, et al. The  
434 GPR54 gene as a regulator of puberty. *New England Journal of Medicine.* 2003;349(17):1614-27. doi:  
435 10.1056/NEJMoa035322.
- 436 6. de Roux N, Genin E, Carel JC, Matsuda F, Chaussain JL, Milgrom E. Hypogonadotropic  
437 hypogonadism due to loss of function of the KiSS1-derived peptide receptor GPR54. *Proc Natl Acad*  
438 *Sci U S A.* 2003;100(19):10972-6. doi: 10.1073/pnas.1834399100.
- 439 7. Day FR, Thompson DJ, Helgason H, Chasman DI, Finucane H, Sulem P, et al. Genomic analyses  
440 identify hundreds of variants associated with age at menarche and support a role for puberty timing in

- 441 cancer risk. *Nat Genet.* 2017;49(6):834-41. doi: 10.1038/ng.3841.
- 442 8. Abreu AP, Dauber A, Macedo DB, Noel SD, Brito VN, Gill JC, et al. Central precocious puberty  
443 caused by mutations in the imprinted gene MKRN3. *N Engl J Med.* 2013;368(26):2467-75. doi:  
444 10.1056/NEJMoa1302160.
- 445 9. Lomniczi A, Wright H, Castellano JM, Sonmez K, Ojeda SR. A system biology approach to identify  
446 regulatory pathways underlying the neuroendocrine control of female puberty in rats and nonhuman  
447 primates. *Horm Behav.* 2013;64(2):175-86. doi: 10.1016/j.yhbeh.2012.09.013.
- 448 10. Zhu W, Fan Z, Zhang C, Guo Z, Zhao Y, Zhou Y, et al. A dominant X-linked QTL regulating  
449 pubertal timing in mice found by whole genome scanning and modified interval-specific congenic  
450 strain analysis. *PLoS One.* 2008;3(8):e3021. doi: 10.1371/journal.pone.0003021.
- 451 11. Bartel D P. MicroRNAs: genomics, biogenesis, mechanism, and function. *Cell*, 2004, 116(2):  
452 281-297. doi: 10.1016/S0092-8674(04)00045-5
- 453 12. Lomniczi A, Wright H, Ojeda SR. Epigenetic regulation of female puberty. *Front*  
454 *Neuroendocrinol.* 2015;36:90-107. doi: 10.1016/j.yfrne.2014.08.003.
- 455 13. Ninomiya M, Kondo Y, Funayama R, Nagashima T, Kogure T, Kakazu E, et al. Distinct  
456 microRNAs expression profile in primary biliary cirrhosis and evaluation of miR 505-3p and  
457 miR197-3p as novel biomarkers. *PLoS One.* 2013;8(6):e66086. doi: 10.1371/journal.pone.0066086.
- 458 14. Khoo SK, Petillo D, Kang UJ, Resau JH, Berryhill B, Linder J, et al. Plasma-based circulating  
459 MicroRNA biomarkers for Parkinson's disease. *J Parkinsons Dis.* 2012;2(4):321-31. doi:  
460 10.3233/JPD-012144.
- 461 15. Pekow JR, Kwon JH. MicroRNAs in Inflammatory Bowel Disease. *Inflammatory Bowel Diseases.*  
462 2012;18(1):187-93. doi: 10.1002/ibd.21691.

- 463 16. Zucchi FC, Yao Y, Ward ID, Ilnytsky Y, Olson DM, Benzie K, et al. Maternal stress induces  
464 epigenetic signatures of psychiatric and neurological diseases in the offspring. *PLoS One*.  
465 2013;8(2):e56967. doi: 10.1371/journal.pone.0056967.
- 466 17. Yamamoto Y, Yoshioka Y, Minoura K, et al. An integrative genomic analysis revealed the  
467 relevance of microRNA and gene expression for drug-resistance in human breast cancer cells. *Mol*  
468 *Cancer*. 2011 Nov 3; 10:135. doi: /10.1186/1476-4598-10-135
- 469 18. Verduci L, Simili M, Rizzo M, Mercatanti A, Evangelista M, Mariani L, et al. MicroRNA  
470 (miRNA)-mediated interaction between leukemia/lymphoma-related factor (LRF) and alternative  
471 splicing factor/splicing factor 2 (ASF/SF2) affects mouse embryonic fibroblast senescence and  
472 apoptosis. *J Biol Chem*. 2010;285(50):39551-63. doi: 10.1074/jbc.M110.114736.
- 473 19. Karni R, Hippo Y, Lowe SW, Krainer AR. The splicing-factor oncoprotein SF2/ASF activates  
474 mTORC1. *Proc Natl Acad Sci U S A*. 2008;105(40):15323-7. doi: 10.1073/pnas.0801376105.
- 475 20. Roa J, Garcia-Galiano D, Varela L, Sanchez-Garrido MA, Pineda R, Castellano JM, et al. The  
476 mammalian target of rapamycin as novel central regulator of puberty onset via modulation of  
477 hypothalamic Kiss1 system. *Endocrinology*. 2009;150(11):5016-26. doi: 10.1210/en.2009-0096.
- 478 21. He C, Kraft P, Chen C, Buring JE, Paré G, Hankinson SE, et al. Genome-wide association studies  
479 identify loci associated with age at menarche and age at natural menopause. *Nature Genetics*.  
480 2009;41:724. doi: 10.1038/ng.385.
- 481 22. Ong KK, Elks CE, Li S, Zhao JH, Luan Ja, Andersen LB, et al. Genetic variation in LIN28B is  
482 associated with the timing of puberty. *Nature Genetics*. 2009;41:729. doi: 10.1038/ng.382.
- 483 23. Perry JRB, Stolk L, Franceschini N, Lunetta KL, Zhai G, McArdle PF, et al. Meta-analysis of  
484 genome-wide association data identifies two loci influencing age at menarche. *Nature Genetics*.

- 485 2009;41:648. doi: 10.1038/ng.386.
- 486 24. Topaloglu AK, Reimann F, Guclu M, Yalin AS, Kotan LD, Porter KM, et al. TAC3 and TACR3  
487 mutations in familial hypogonadotropic hypogonadism reveal a key role for Neurokinin B in the central  
488 control of reproduction. *Nature Genetics*. 2008;41:354. doi: 10.1038/ng.306.
- 489 25. Uenoyama Y, Tsukamura H, Maeda K. KNDy neuron as a gatekeeper of puberty onset. *J Obstet  
490 Gynaecol Res*. 2014;40(6):1518-26. doi: 10.1111/jog.12398.
- 491 26. Xu Y, Faulkner LD, Hill JW. Cross-Talk between Metabolism and Reproduction: The Role of  
492 POMC and SF1 Neurons. *Front Endocrinol (Lausanne)*. 2011;2:98. doi: 10.3389/fendo.2011.00098.
- 493 27. Avendaño MS, Vazquez MJ, Tena-Sempere M. Disentangling puberty: novel neuroendocrine  
494 pathways and mechanisms for the control of mammalian puberty. *Human Reproduction Update*.  
495 2017;23(6):737-63. doi: 10.1093/humupd/dmx025.
- 496 28. Hasuwa H, Ueda J, Ikawa M, et al. miR-200b and miR-429 function in mouse ovulation and are  
497 essential for female fertility. *Science*, 2013, 341(6141): 71-73. doi: 10.1126/science.1237999.
- 498 29. Zhu H, Shah S, Shyh-Chang N, Shinoda G, Einhorn WS, Viswanathan SR, et al. Lin28a transgenic  
499 mice manifest size and puberty phenotypes identified in human genetic association studies. *Nature  
500 Genetics*. 2010;42:626. doi: 10.1038/ng.593.
- 501 30. Sangiao-Alvarellos S, Manfredi-Lozano M, Ruiz-Pino F, Navarro VM, Sanchez-Garrido MA, Leon  
502 S, et al. Changes in hypothalamic expression of the Lin28/let-7 system and related microRNAs during  
503 postnatal maturation and after experimental manipulations of puberty. *Endocrinology*.  
504 2013;154(2):942-55. doi: 10.1210/en.2012-2006.
- 505 31. Sachdeva M, Mo Y-Y. miR-145-mediated suppression of cell growth, invasion and metastasis.  
506 *American Journal of Translational Research*. 2010;2(2):170-80.

- 507 32. Messina A, Langlet F, Chachlaki K, Roa J, Rasika S, Jouy N, et al. A microRNA switch regulates  
508 the rise in hypothalamic GnRH production before puberty. *Nat Neurosci.* 2016;19(6):835-44. doi:  
509 10.1038/nn.4298.
- 510 33. Eleftheriadou I, Mazarakis N D. Lentiviral Vectors for Gene Delivery to the Nervous System. *Gene*  
511 *Delivery and Therapy for Neurological Disorders*, 2015,pp 23-66.
- 512 34. Zhao W, Dong Y, Wu C, Ma Y, Jin Y, Ji Y. MiR-21 overexpression improves osteoporosis by  
513 targeting RECK. *Mol Cell Biochem.* 2015;405(1-2):125-33. doi: 10.1007/s11010-015-2404-4.
- 514 35. Zeng L, He X, Wang Y, Tang Y, Zheng C, Cai H, et al. MicroRNA-210 overexpression induces  
515 angiogenesis and neurogenesis in the normal adult mouse brain. *Gene Therapy.* 2013;21:37. doi:  
516 10.1038/gt.2013.55.
- 517 36. Yang K, Yu B, Cheng C, Cheng T, Yuan B, Li K, et al. Mir505-3p regulates axonal development  
518 via inhibiting the autophagy pathway by targeting Atg12. *Autophagy.* 2017;13(10):1679-96. doi:  
519 10.1080/15548627.2017.1353841.
- 520 37. Mizushima N, Yoshimori T, Levine B. Methods in mammalian autophagy research. *Cell.*  
521 2010;140(3):313-26. doi: 10.1016/j.cell.2010.01.028.
- 522 38. Kovács AL, Telbisz Á, Eldib A. Autophagy in hepatocytes and erythropoietic cells isolated from  
523 the twenty-one day old rat embryo. *Acta Biologica Hungarica.* 2001;52(4):417-33. doi:  
524 10.1556/ABiol.52.2001.4.7.
- 525 39. Yang K, Tong L, Li K, Zhou Y, Xiao J. A SRSF1 self-binding mechanism restrains Mir505-3p  
526 from inhibiting proliferation of neural tumor cell lines. *Anti-Cancer Drugs.* 2018;29(1):40-9. doi:  
527 10.1097/cad.0000000000000564.
- 528 40. Karni R, de Stanchina E, Lowe SW, Sinha R, Mu D, Krainer AR. The gene encoding the splicing



- 529 factor SF2/ASF is a proto-oncogene. *Nature Structural & Molecular Biology*. 2007;14:185. doi:  
530 10.1038/nsmb1209.
- 531 41. Ghigna C, Giordano S, Shen H, Benvenuto F, Castiglioni F, Comoglio PM, et al. Cell motility is  
532 controlled by SF2/ASF through alternative splicing of the Ron protooncogene. *Mol Cell*.  
533 2005;20(6):881-90. doi: 10.1016/j.molcel.2005.10.026.
- 534 42. Shao R, Wang X, Weijdegard B, Norstrom A, Fernandez-Rodriguez J, Brannstrom M, et al.  
535 Coordinate regulation of heterogeneous nuclear ribonucleoprotein dynamics by steroid hormones in the  
536 human fallopian tube and endometrium in vivo and in vitro. *Am J Physiol Endocrinol Metab*.  
537 2012;302(10):E1269-82. doi: 10.1152/ajpendo.00673.2011.
- 538 43. Song MJ, Jung CK, Park CH, Hur W, Choi JE, Bae SH, et al. RPL36 as a prognostic marker in  
539 hepatocellular carcinoma. *Pathol Int*. 2011;61(11):638-44. doi: 10.1111/j.1440-1827.2011.02716.x.
- 540 44. Provost E, Bailey JM, Aldrugh S, Liu S, Iacobuzio-Donahue C, Leach SD. The tumor suppressor  
541 rpl36 restrains KRAS(G12V)-induced pancreatic cancer. *Zebrafish*. 2014;11(6):551-9. doi:  
542 10.1089/zeb.2014.1024.
- 543 45. Zhou X, Liao WJ, Liao JM, Liao P, Lu H. Ribosomal proteins: functions beyond the ribosome. *J*  
544 *Mol Cell Biol*. 2015;7(2):92-104. doi: 10.1093/jmcb/mjv014.
- 545 46. Paxinos G, Franklin K B J. *The mouse brain in stereotaxic coordinates*. Gulf Professional  
546 Publishing, 2004.
- 547 47. Mellon PL, Windle JJ, Goldsmith PC, Padula CA, Roberts JL, Weiner RI. Immortalization of  
548 hypothalamic GnRH by genetically targeted tumorigenesis. *Neuron*. 1990;5(1):1-10. doi:  
549 10.1016/0896-6273(90)90028-E

550 **Figure Legends**

551 **Fig 1.** The evidence of miR-505-3p being a candidate gene in the puberty onset related QTL on  
552 chromosome X. A: schematic representation of the ISCSs and control strains. The genotype on  
553 chromosome X for each of the 8 congenic strains is represented by the horizontal bars. Green portions  
554 indicate a known homozygous B6 segment, blank portions represent a known homozygous C3  
555 segment, and hatched regions depict an area where a crossover between C3 and B6 occurred. The  
556 dotted lines indicate the boundary of the refined QTL. B: The expression situation of six protein-coding  
557 genes in the QTL in HPG axis in B6 and C3 strains. H: hypothalamus; P: pituitary; O: ovary. C: The  
558 expression difference of miR-505-3p in HPG axis between B6 and C3H mice. D: The Spatial-specific  
559 expression of miR-505-3p in different time point of B6 mice. E: The temporal-specific expression of  
560 miR-505-3p in different tissues of B6 mice. F: The expression level of puberty related genes in GT1-7  
561 and pGT1-7 cells. Bars are means and vertical bars represent SEM (\* P<0.05, \*\* P<0.01, \*\*\* P<0.001).

562 **Fig 2.** The influence of miR-505-3p ectopic expression in the hypothalamus on the body weight, VO  
563 timing and fertility of the tested mice. A: the growth curve of the mice B: the VO time of the tested  
564 mice; C: The interval time between mating with male mice and delivery (LV-treated=25.83 ±1.144d,  
565 saline-treated=24.33 ±1.247d, untreated=22.92 ±0.8307, P<0.05,\*); D: the death rate of offspring  
566 before weaning of the tested mice (newborn offspring: LV-treated=6.100 ±0.7944,  
567 saline-treated=7.111 ±0.3093, untreated=7.949 ±0.1798, ; dead offspring: LV-treated=2.1110±0.6256,  
568 saline-treated=0.1111 ±0.1111, untreated=0.2564 ±0.1085. P<0.05 \*, P<0.01\*\*)

569 **Fig 3.** The HE stained ovarian sections at various time

570 **Fig 4.** Fertility analysis and in situ hybridization of the brain section. A: Pie chart shows the percentage  
571 of female mice which had different number of dead litters and the rate of abortion and infertility among  
572 the three groups; B: Images of coronal sections showed the fluorescence signals of hypothalamic

573 miR-505-3p detected by in situ hybridization among one sterile, one reduced fertility, one normal,  
 574 saline-treated and untreated mice using U6 , miR-505-3p and scrambled LNA probes ,respectively.

575 **Fig 5: The phenotype of miR-505-3p knockout mice.** A: The growth curve of the DKO, SKO and  
 576 WT mice; B: the percentage of female mice attaining VO at different time point; C: the mass of  
 577 reproductive system at PND45; D: The serum LH and FSH of the DKO and WT mice; E: HE stained  
 578 ovarian sections of the tested mice. (\*: P<0.05, \*\*: P<0.01)

579 **Fig 6. The expression level of *Srsf1*, *Kiss1* and *GnRH* in the hypothalamus of mice at PND15,**  
 580 **PND25, PND45.**

581 **Fig 7: miR-505-3p and its target gene *Srsf1* play a role in the puberty onset regulation.** A: The  
 582 translation of *Srsf1* was inhibited by miR-505-3p in pGT1-7 cell line. B: The expression level of  
 583 puberty related genes in pGT1-7 after *Srsf1* overexpression. Bars are means and vertical bars represent  
 584 SEM (\* P<0.05, \*\* P<0.01, \*\*\* P<0.001, ns no statistical significance). C: *Srsf1*, *Kiss1* and *GnRH*  
 585 expression level in the hypothalamus of miR-505-3p KO mice at PND15, PND25, PND45

586 **Fig 8. Pathway analysis of differentially expressed genes between GT1-7 and pGT1-7 cell.**

587

588 **Table 1.** Effect of miR-505-3p deficiency on female fertility.

| Strains        | Litters | Dystocia in female<br>(%) | Mean litter<br>size | <i>P</i> <sup>b</sup> | Dead offspring<br>(% at 48h) |
|----------------|---------|---------------------------|---------------------|-----------------------|------------------------------|
| WT             | 30      | 0                         | 6.032 (0.3485)      |                       | 1.07                         |
| miR-505-3p +/- | 35      | 31.4                      | 7.125 (0.3677)      | 0.0373                | 29.8                         |

589 Note: a: Values are the mean (s.e.m.). b: P value for mean litter size compared to wild type.

590

591 **Table 2. Top 10 gene list of SF2 pull down sample RNA-seq data compare to two control**

592 **samples' data separately**

| gene        | sampl<br>e_1 | sampl<br>e_2 | value<br>_2 | log2(fold_c<br>hange) | gene        | sampl<br>e_1 | sampl<br>e_2 | value<br>_2 | log2(fold_c<br>hange) |
|-------------|--------------|--------------|-------------|-----------------------|-------------|--------------|--------------|-------------|-----------------------|
| Eif4a       |              | SRSF         | 1514        |                       | <b>Rpl1</b> | total        | SRSF         | 1474        |                       |
|             | IgG          |              |             | 4.9594                |             |              |              |             | 5.1391                |
| 2           |              | 1            | 3.60        |                       | <b>9</b>    | RNA          | 1            | 1.80        |                       |
| <b>Rpl1</b> |              | SRSF         | 854.9       |                       |             | total        | SRSF         | 6198.       |                       |
|             | IgG          |              |             | 5.6497                | <b>Rpl7</b> |              |              |             | 4.5250                |
| <b>9</b>    |              | 1            | 4           |                       |             | RNA          | 1            | 61          |                       |
| Ppm         |              | SRSF         | 580.7       |                       |             | total        | SRSF         | 8300.       |                       |
|             | IgG          |              |             | 2.9438                | <b>Rps9</b> |              |              |             | 4.0617                |
| 1h          |              | 1            | 2           |                       |             | RNA          | 1            | 55          |                       |
| <b>Rpl2</b> |              | SRSF         | 571.0       |                       | <b>Rpl2</b> | total        | SRSF         | 6480.       |                       |
|             | IgG          |              |             | 4.7366                |             |              |              |             | 3.6071                |
| <b>1</b>    |              | 1            | 1           |                       | <b>1</b>    | RNA          | 1            | 69          |                       |
| <b>Rps1</b> |              | SRSF         | 512.6       |                       | <b>Rps1</b> | total        | SRSF         | 7648.       |                       |
|             | IgG          |              |             | 4.3983                |             |              |              |             | 3.0312                |
| <b>4</b>    |              | 1            | 9           |                       | <b>4</b>    | RNA          | 1            | 64          |                       |
| Psmc        |              | SRSF         | 440.0       |                       | Ccdc        | total        | SRSF         | 2878.       |                       |
|             | IgG          |              |             | 3.4028                |             |              |              |             | 5.8550                |
| 4           |              | 1            | 8           |                       | 124         | RNA          | 1            | 78          |                       |
| <b>Rps9</b> |              | SRSF         | 384.7       |                       | Dus1        | total        | SRSF         | 1316.       |                       |
|             | IgG          |              |             | 3.8331                |             |              |              |             | 5.1459                |
|             |              | 1            | 8           |                       | <b>1</b>    | RNA          | 1            | 45          |                       |
| Nudc        |              | SRSF         | 334.2       |                       | Psmc        | total        | SRSF         | 3105.       |                       |
|             | IgG          |              |             | 5.0492                |             |              |              |             | 4.8709                |
|             |              | 1            | 9           |                       | <b>4</b>    | RNA          | 1            | 27          |                       |
| <b>Rpl7</b> |              | SRSF         | 332.5       |                       |             | total        | SRSF         | 5493.       |                       |
|             | IgG          |              |             | 4.0535                | Nudc        |              |              |             | 4.8040                |
|             |              | 1            | 3           |                       |             | RNA          | 1            | 75          |                       |

---

|      |     |      |       |        |     |       |      |       |        |
|------|-----|------|-------|--------|-----|-------|------|-------|--------|
| Rund |     | SRSF | 317.4 |        | Tim | total | SRSF | 1080. |        |
|      | IgG |      |       | 3.7359 |     |       |      |       | 4.7274 |
| c3a  |     | 2    | 4     |        | m23 | RNA   | 2    | 61    |        |

---

593

594

# Marker

(Position, bp)

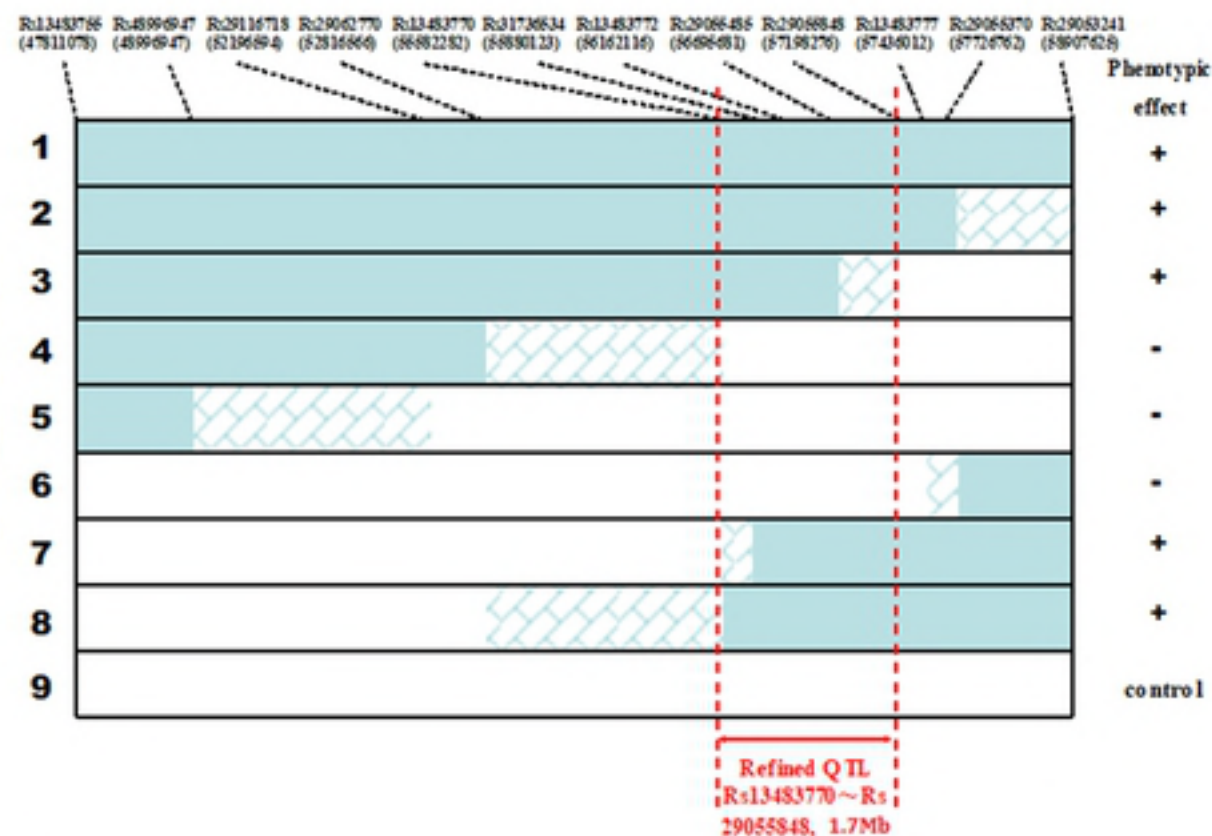

# B

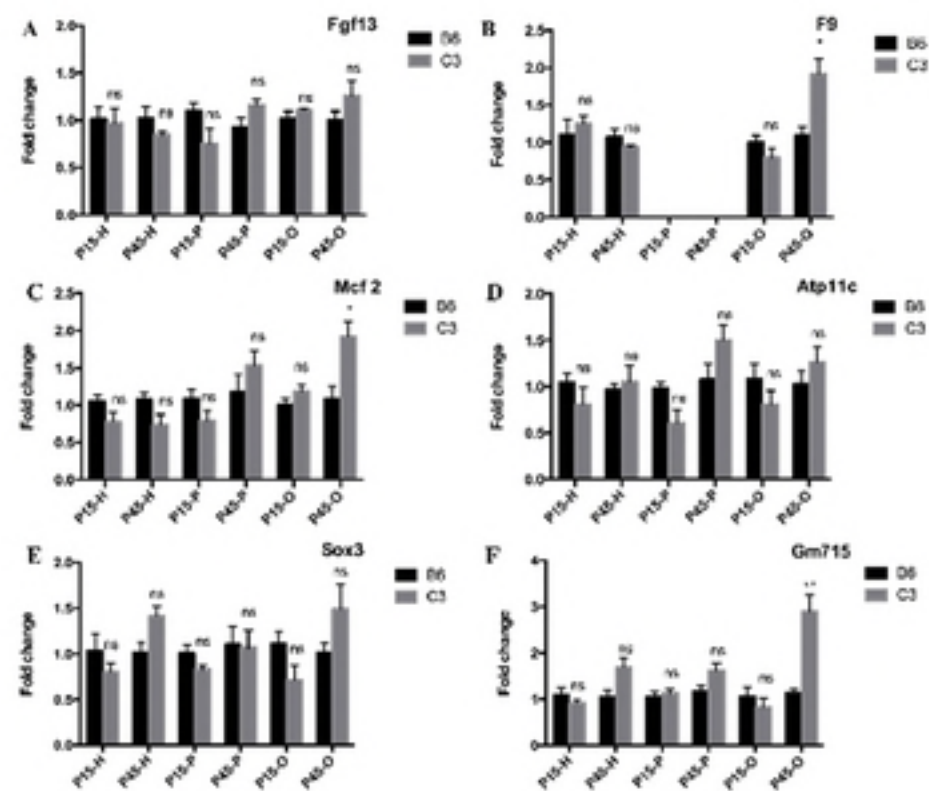

# C

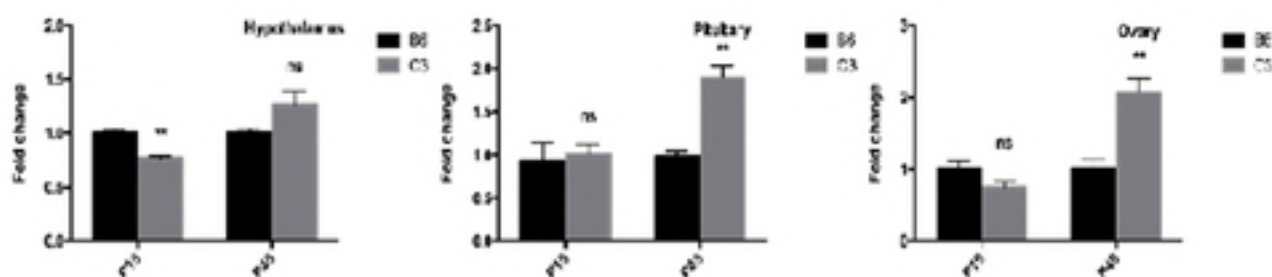

# D

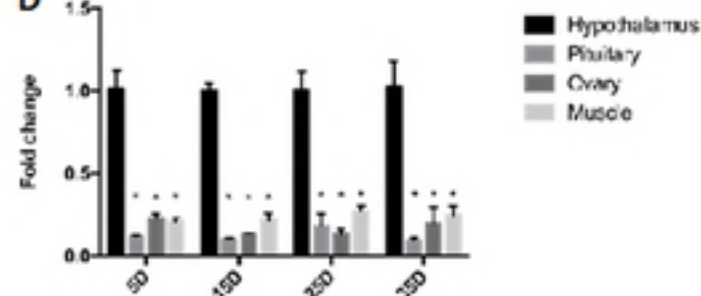

# F

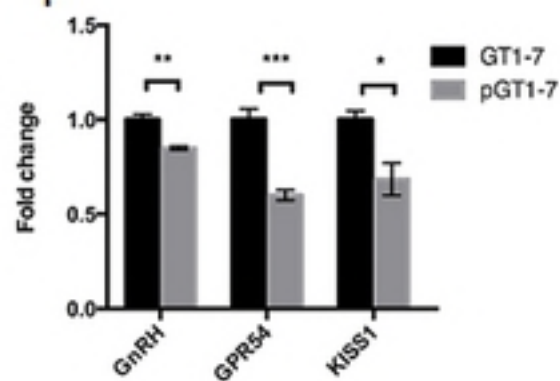

# E

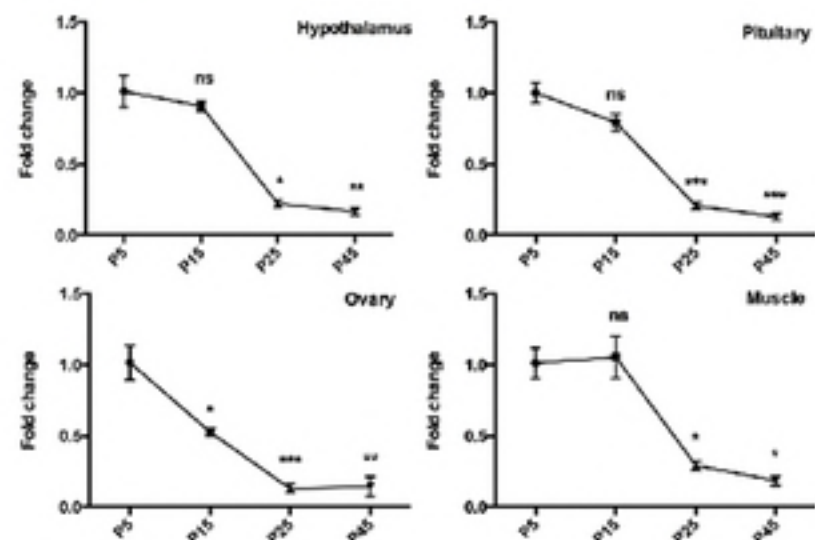

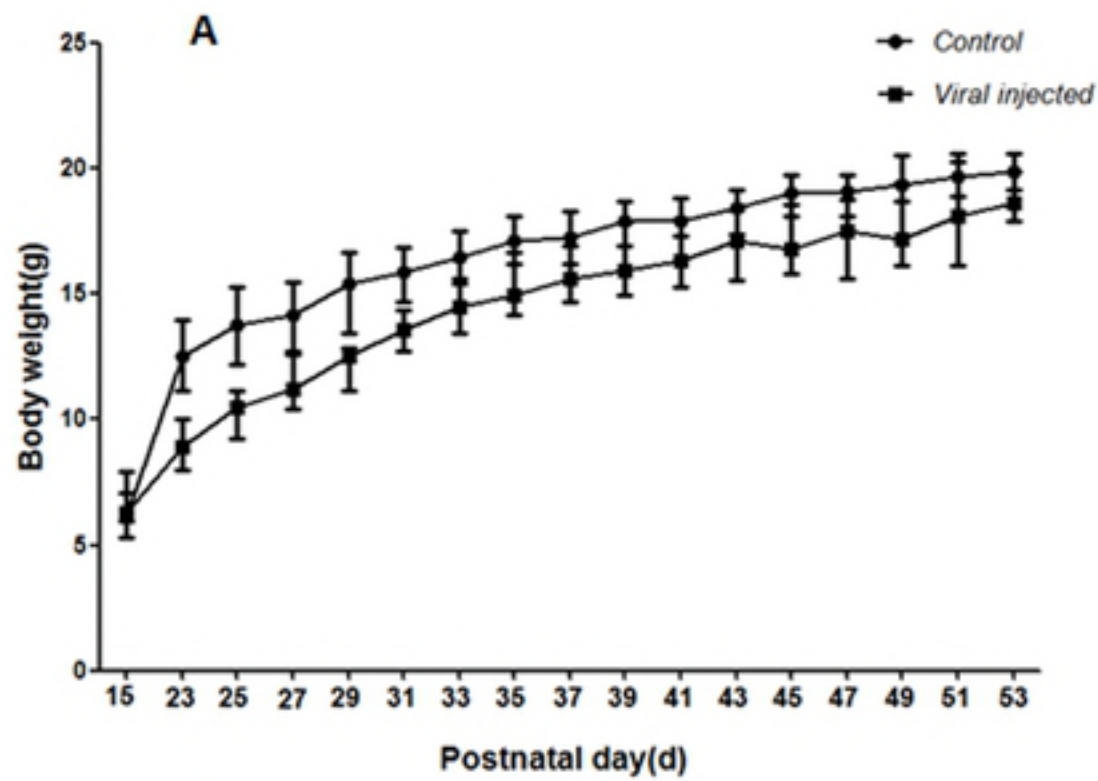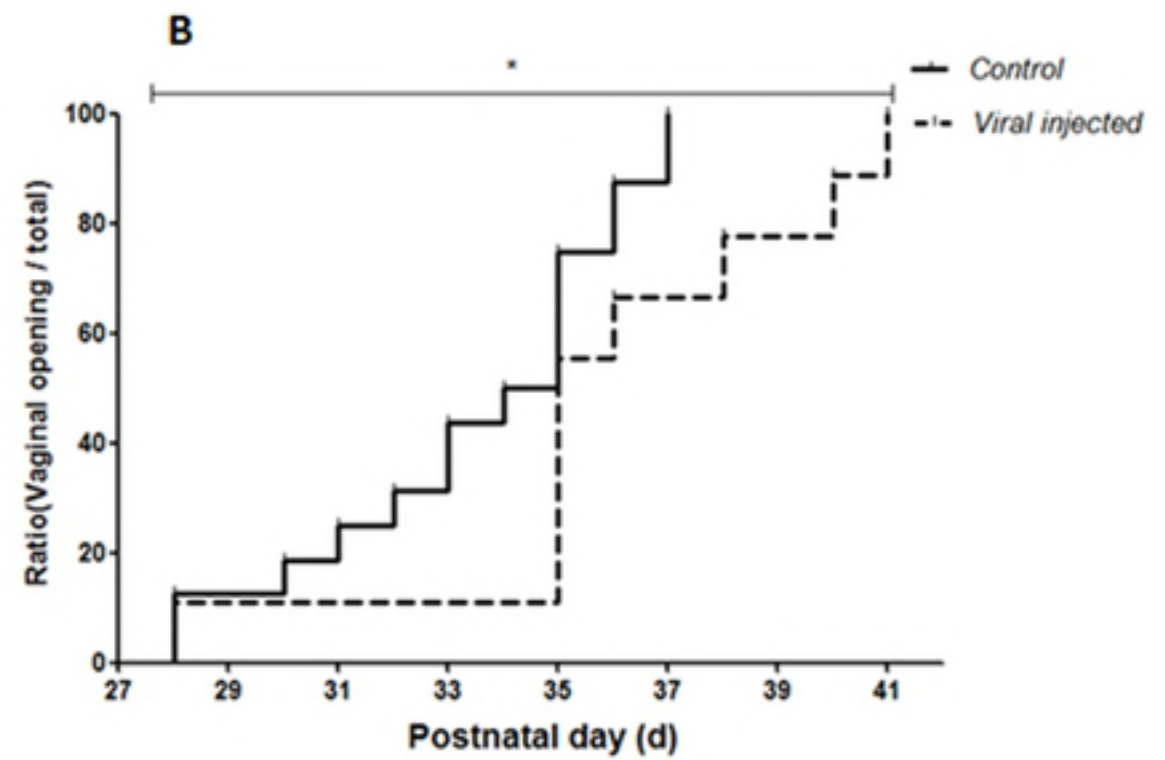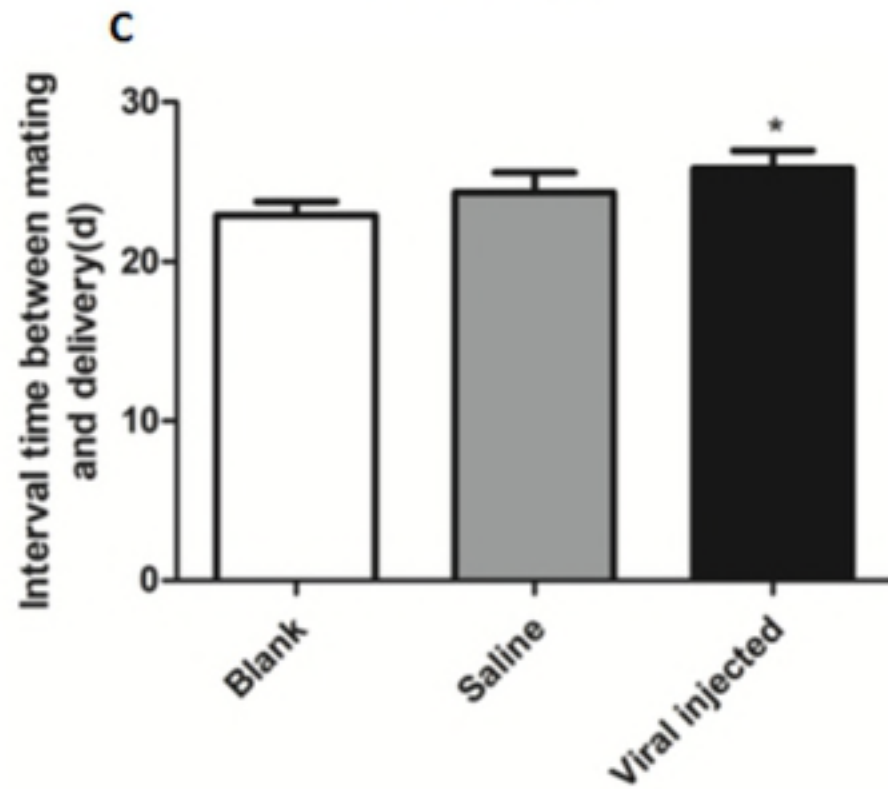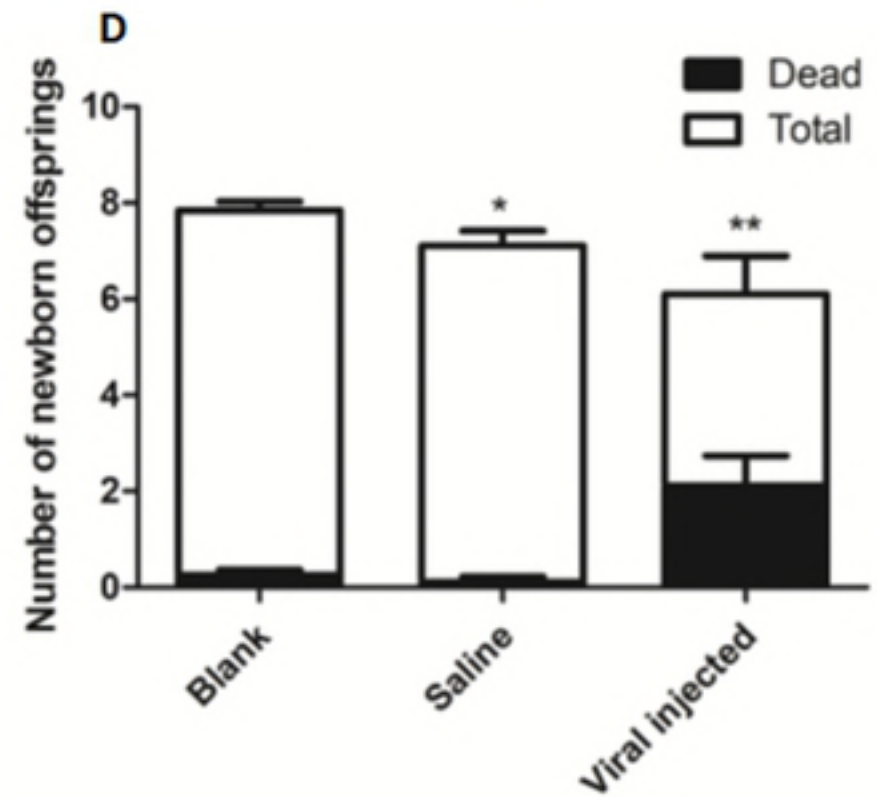

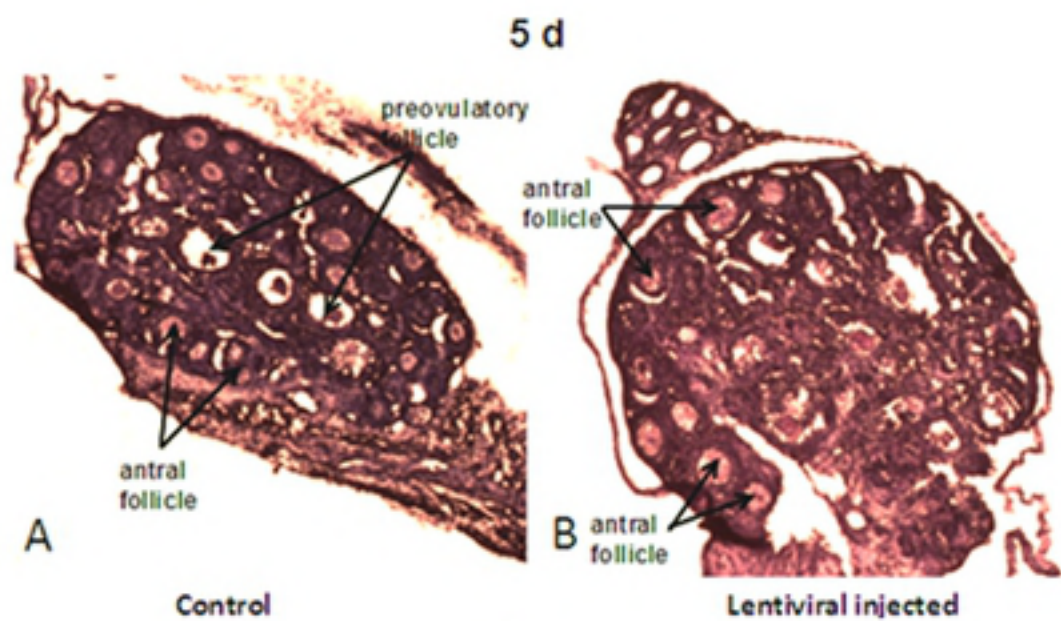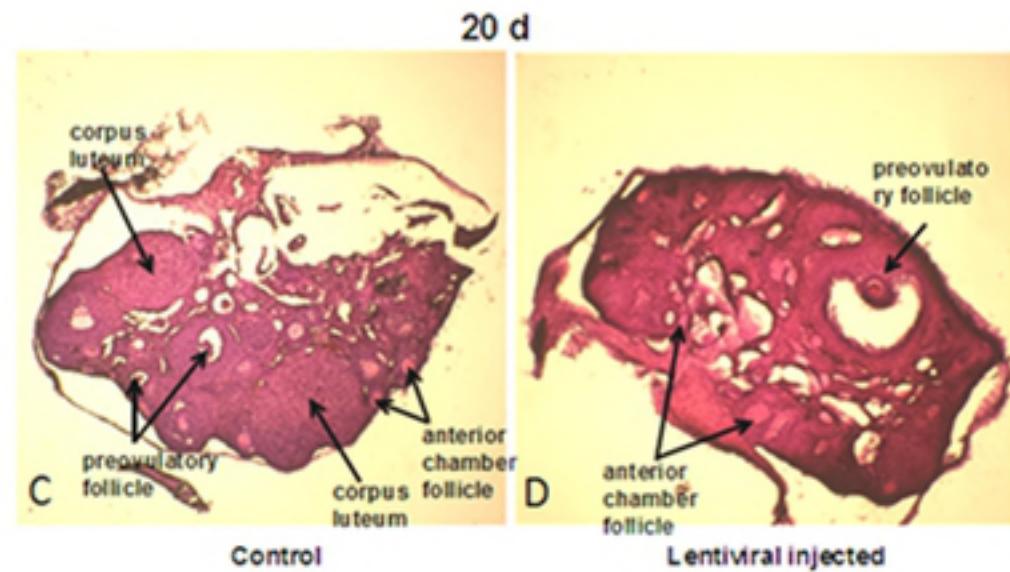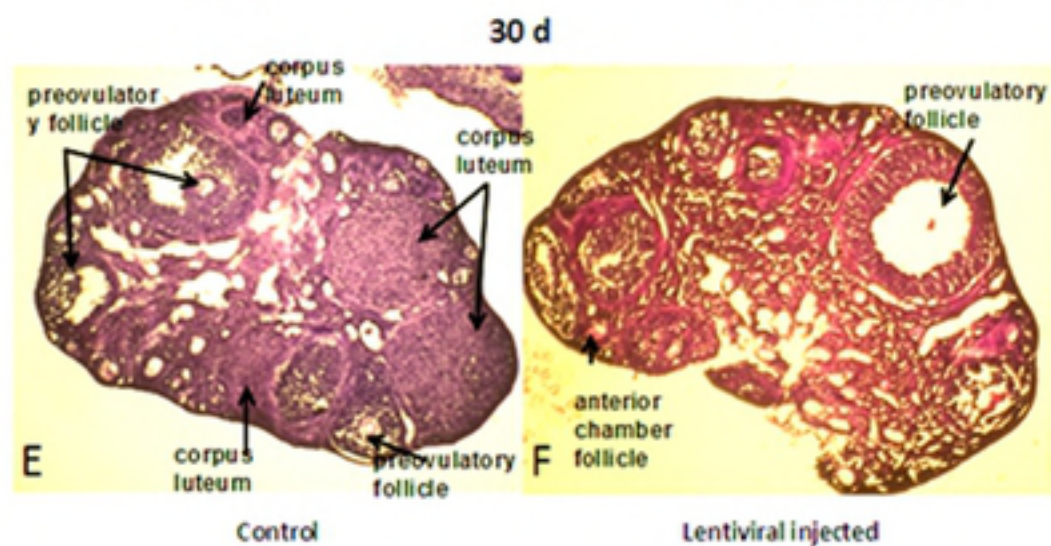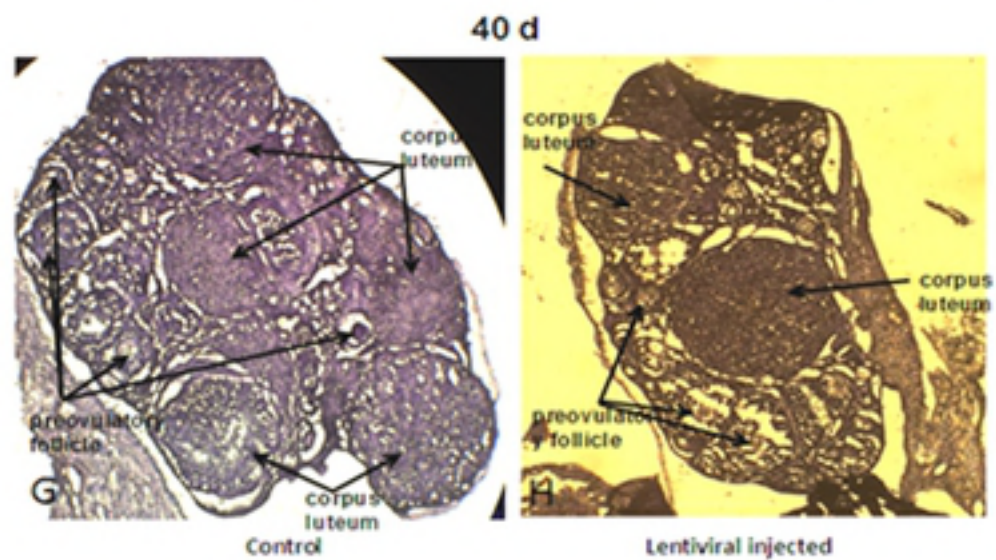



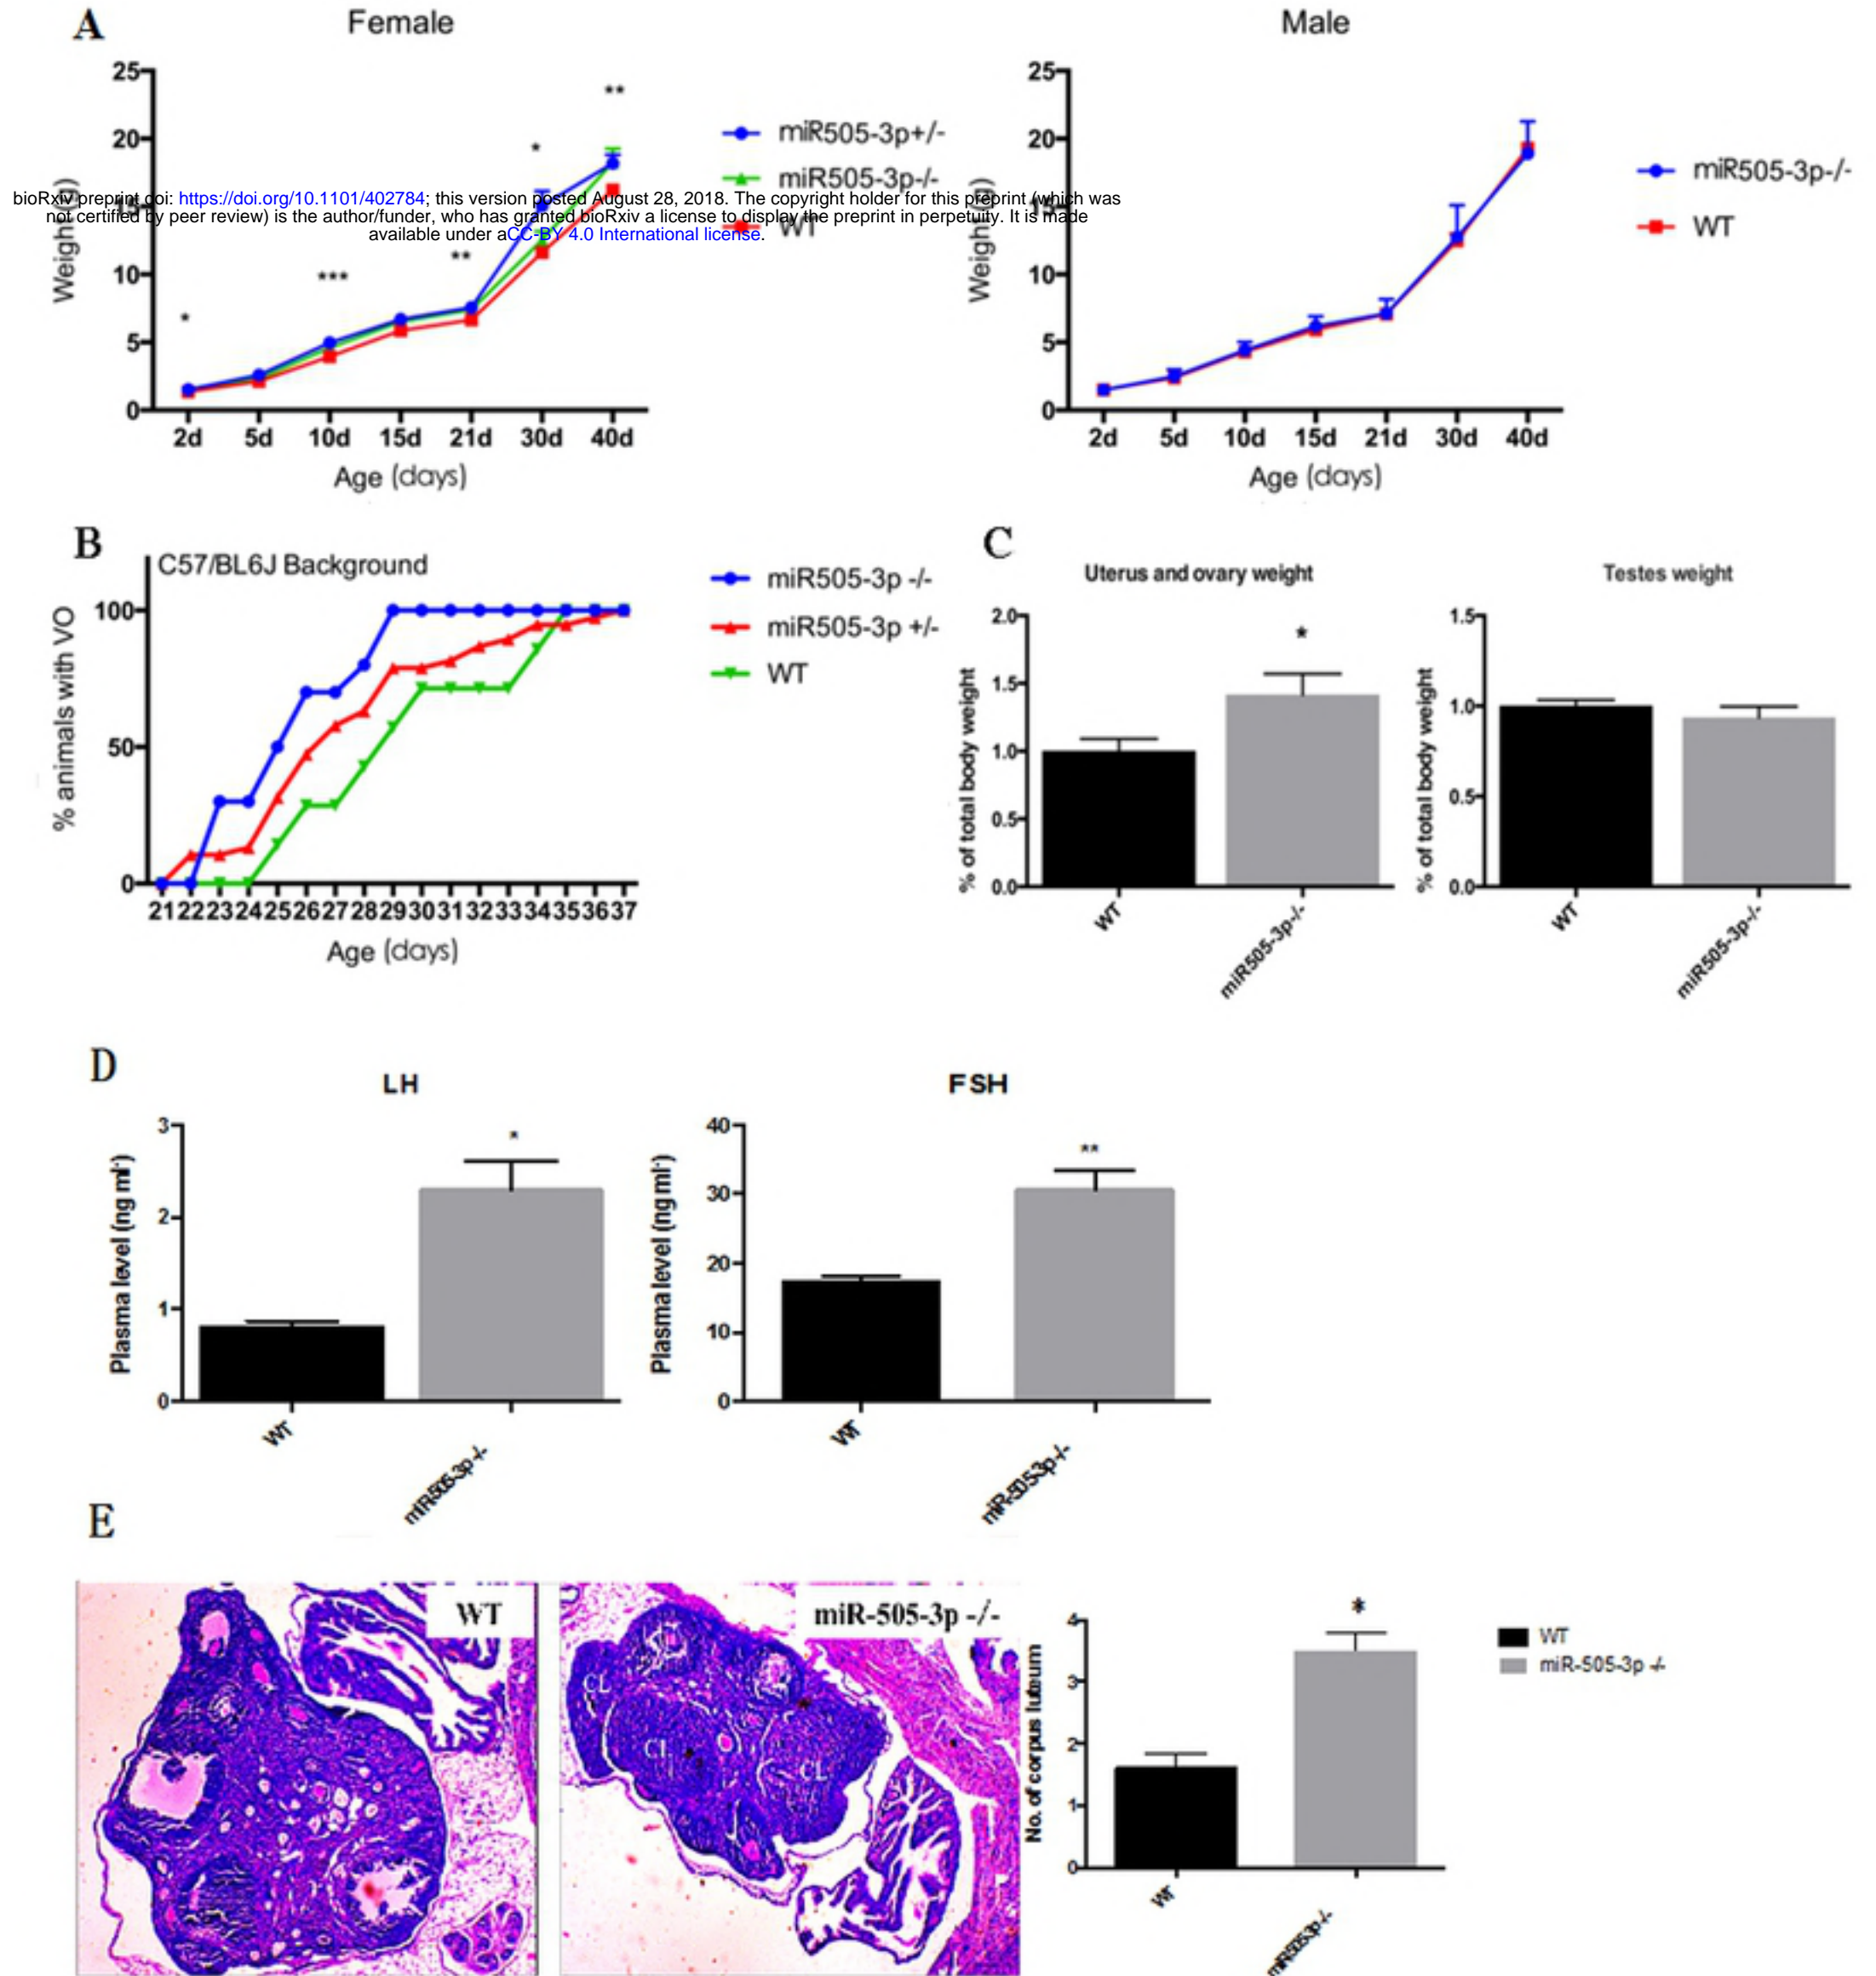



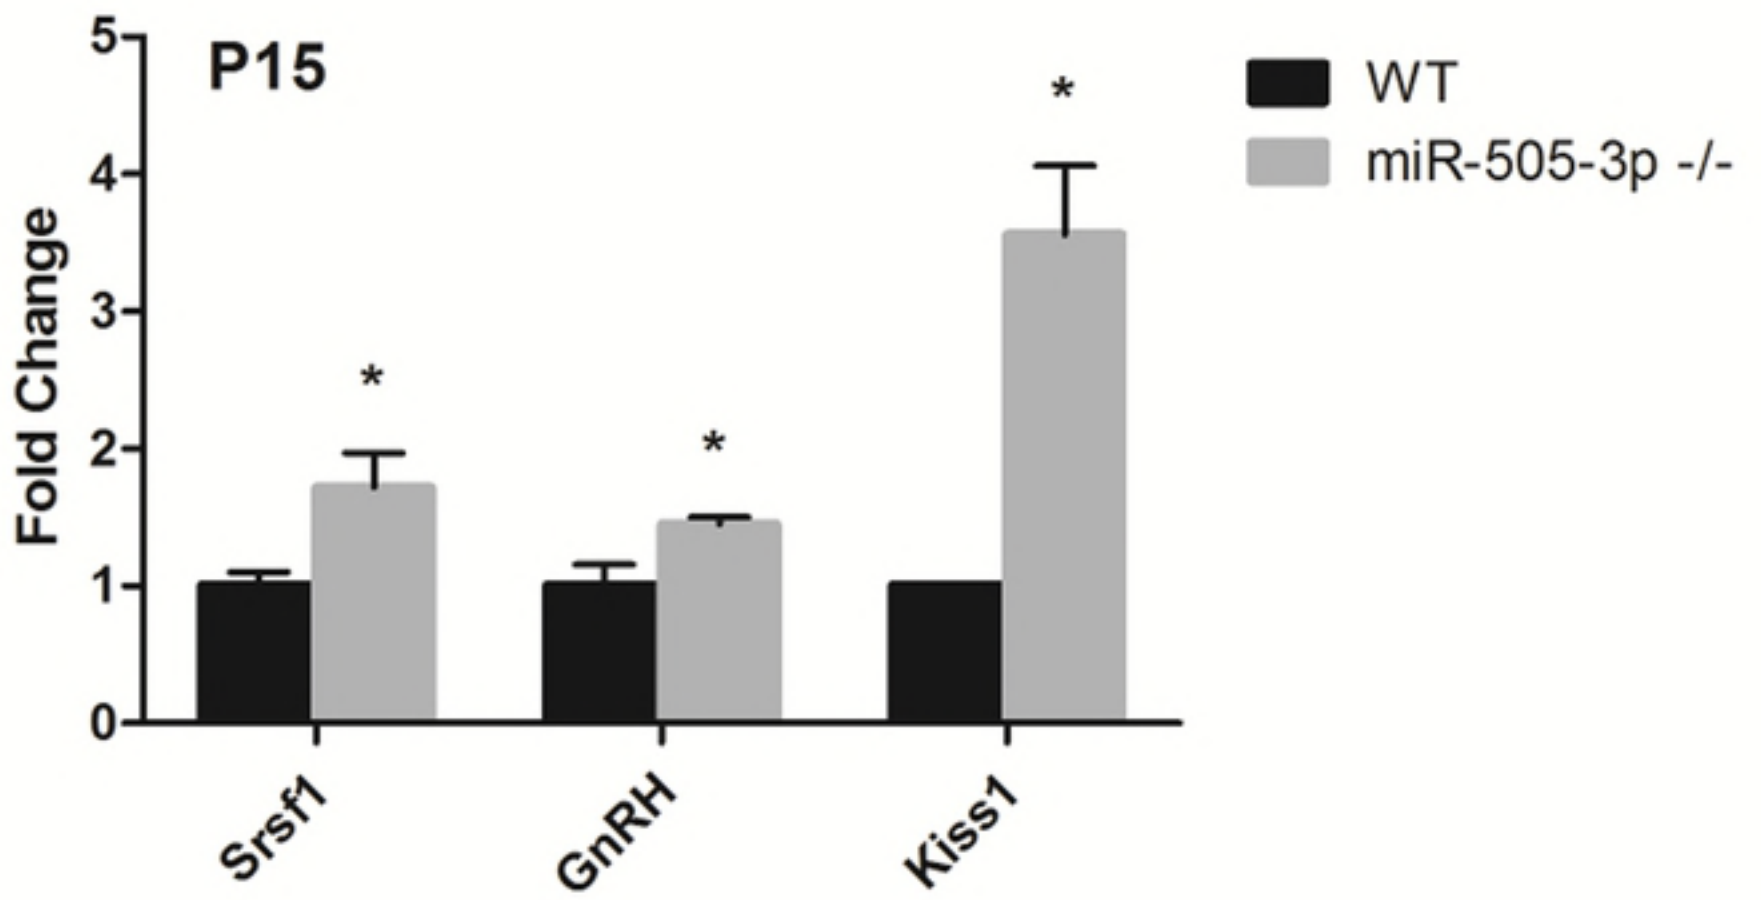

bioRxiv preprint doi: <https://doi.org/10.1101/402784>; this version posted August 28, 2018. The copyright holder for this preprint (which was not certified by peer review) is the author/funder, who has granted bioRxiv a license to display the preprint in perpetuity. It is made available under aCC-BY 4.0 International license.

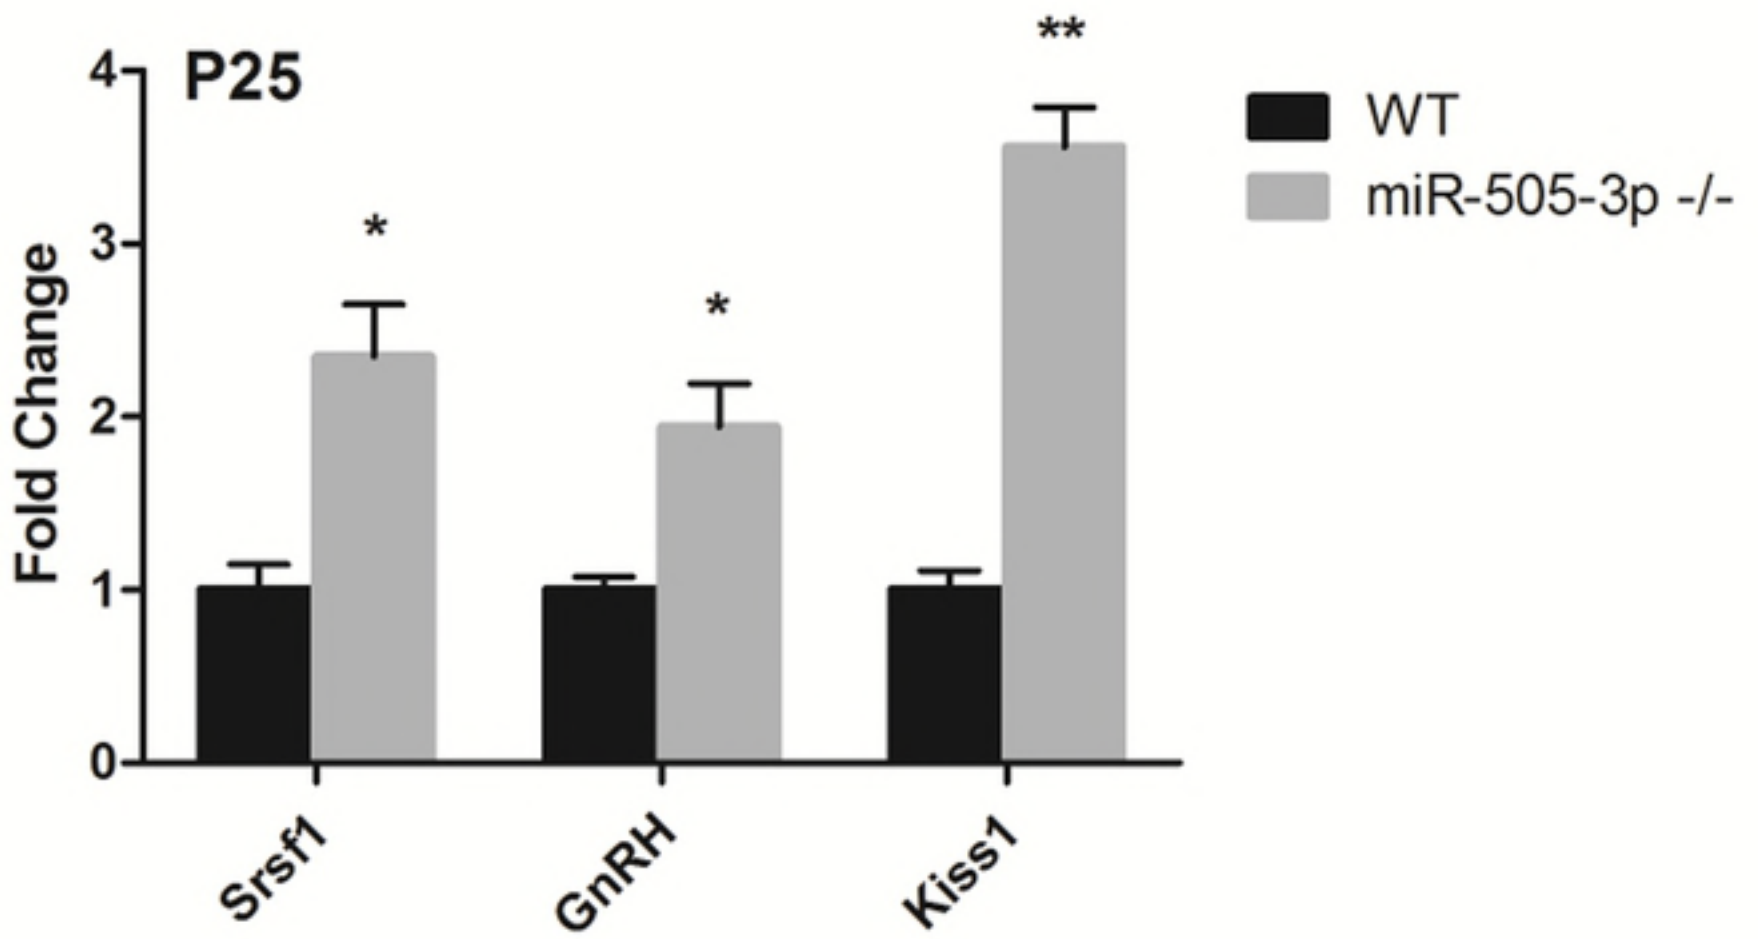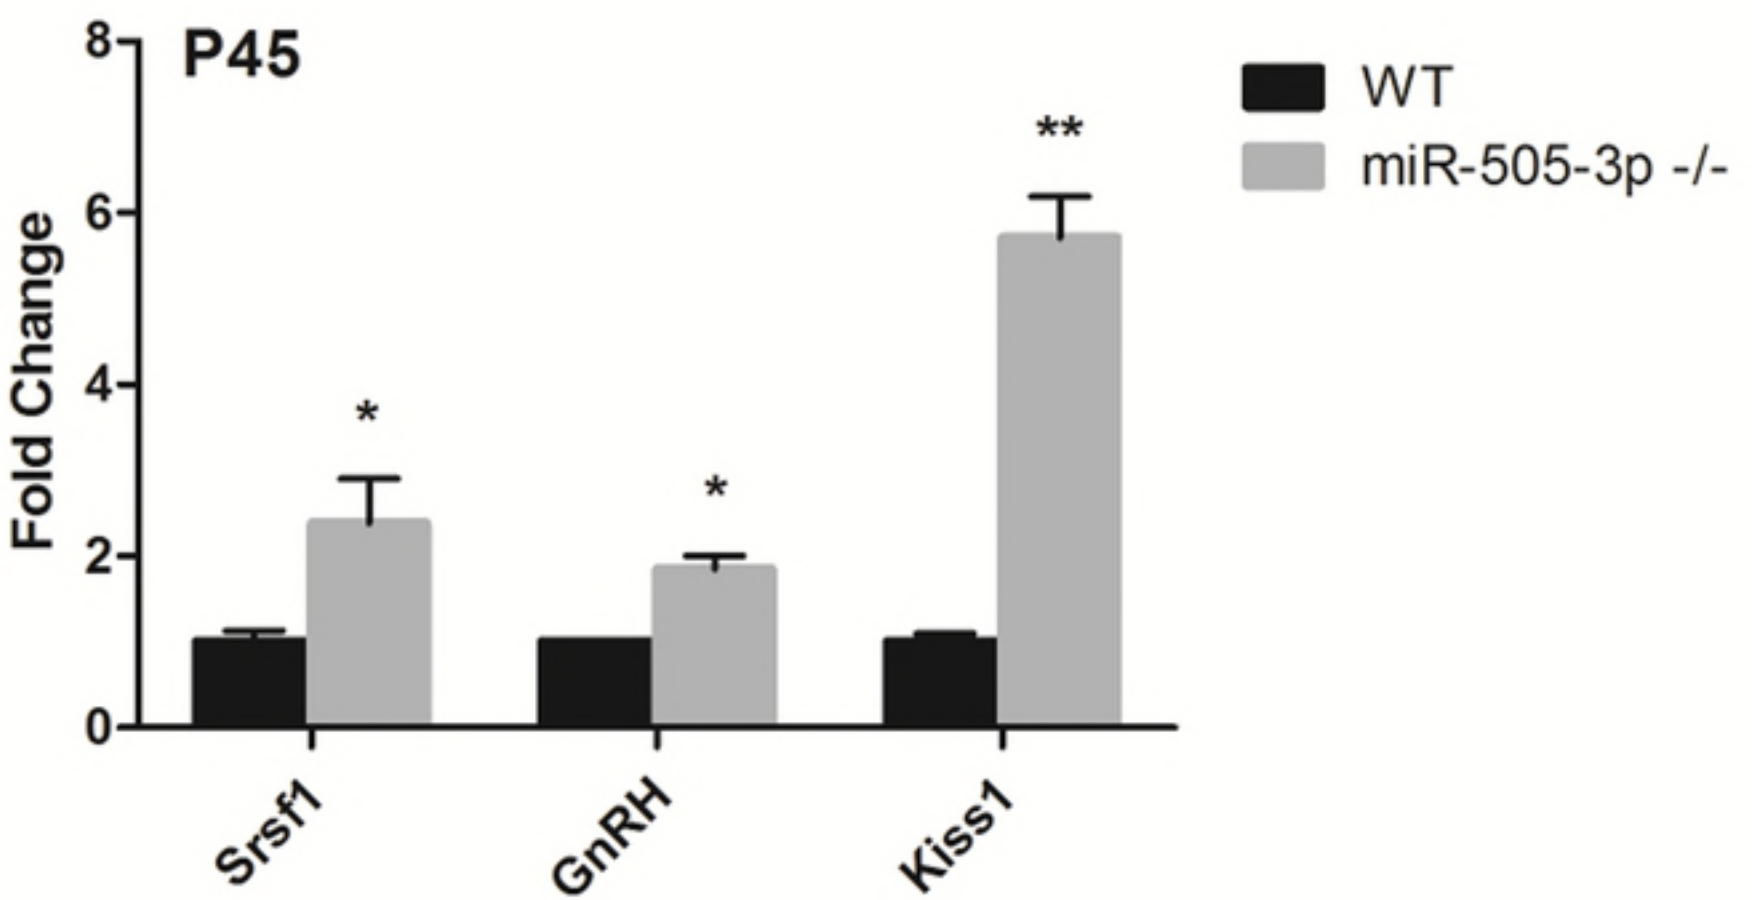

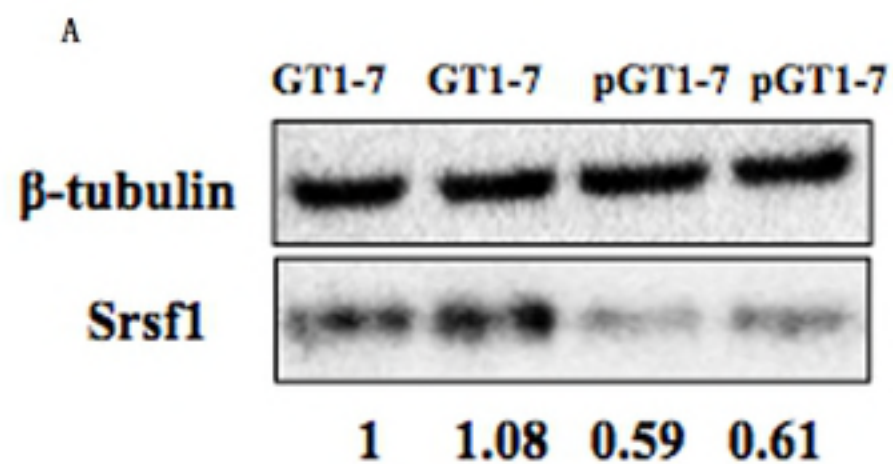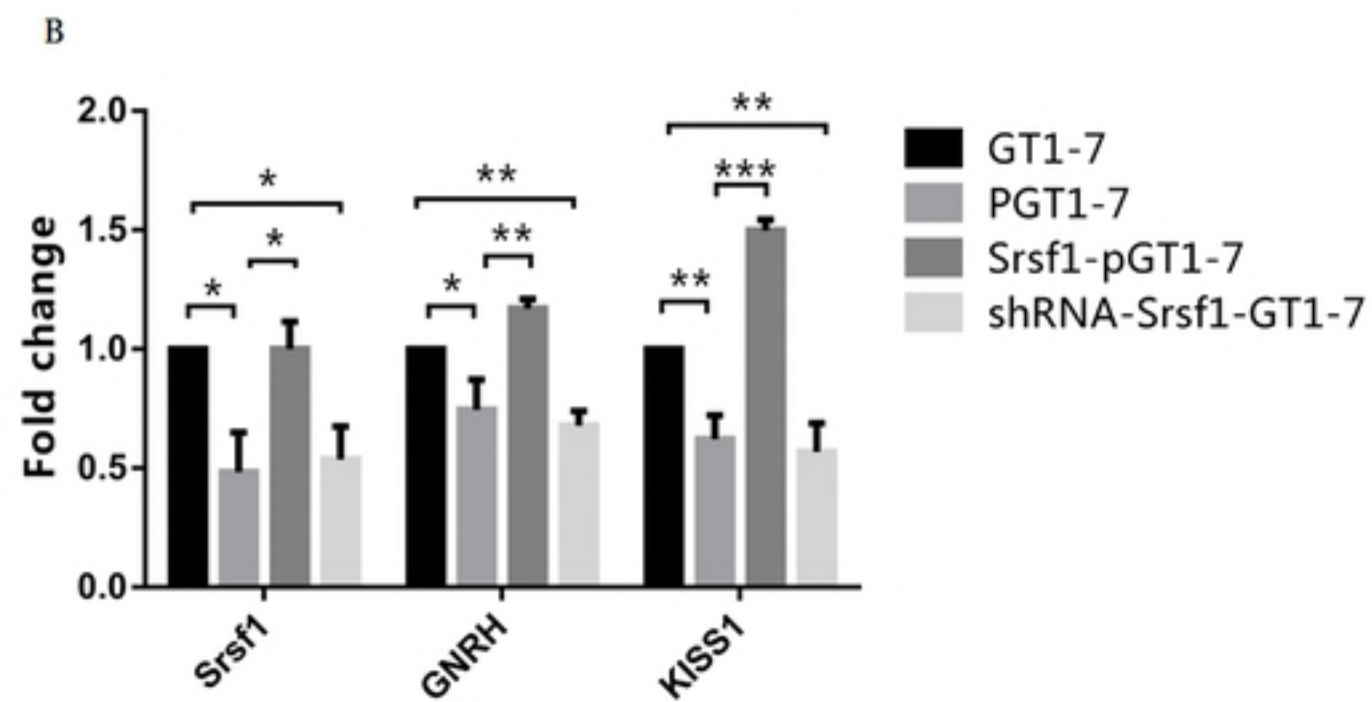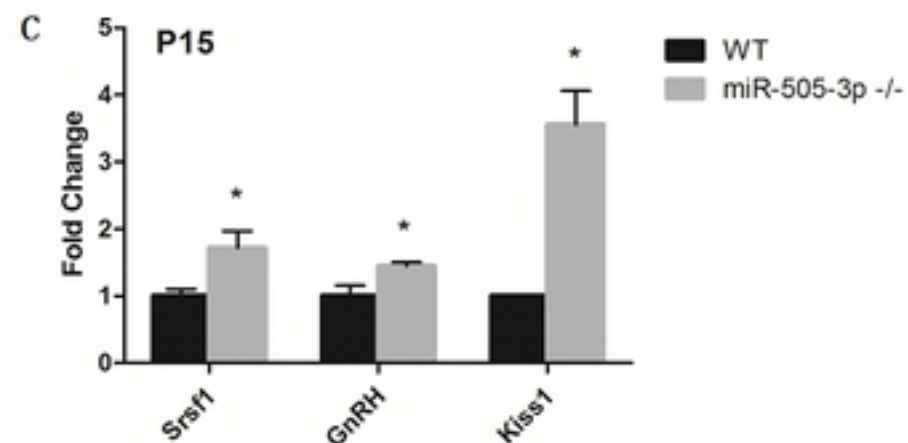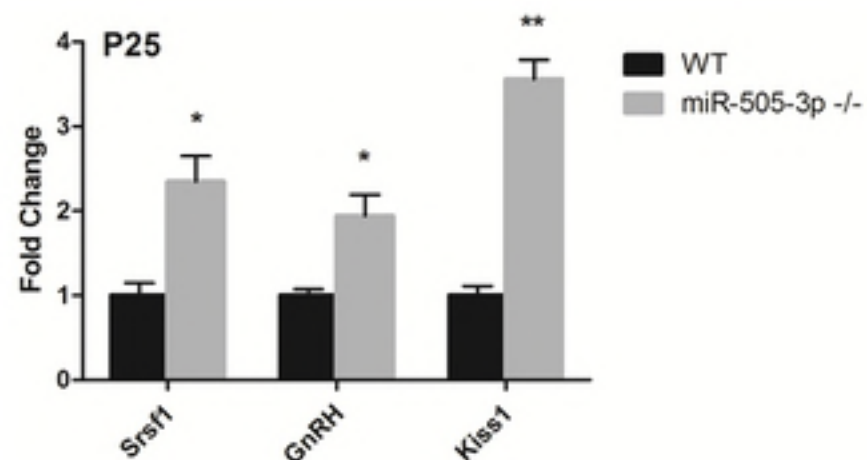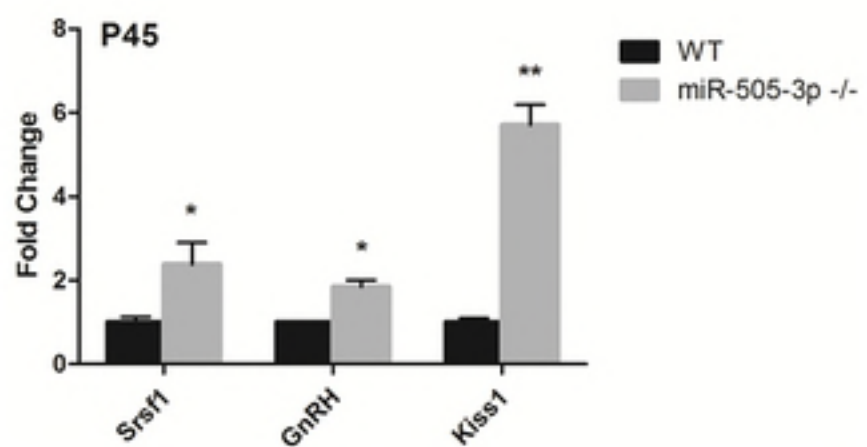

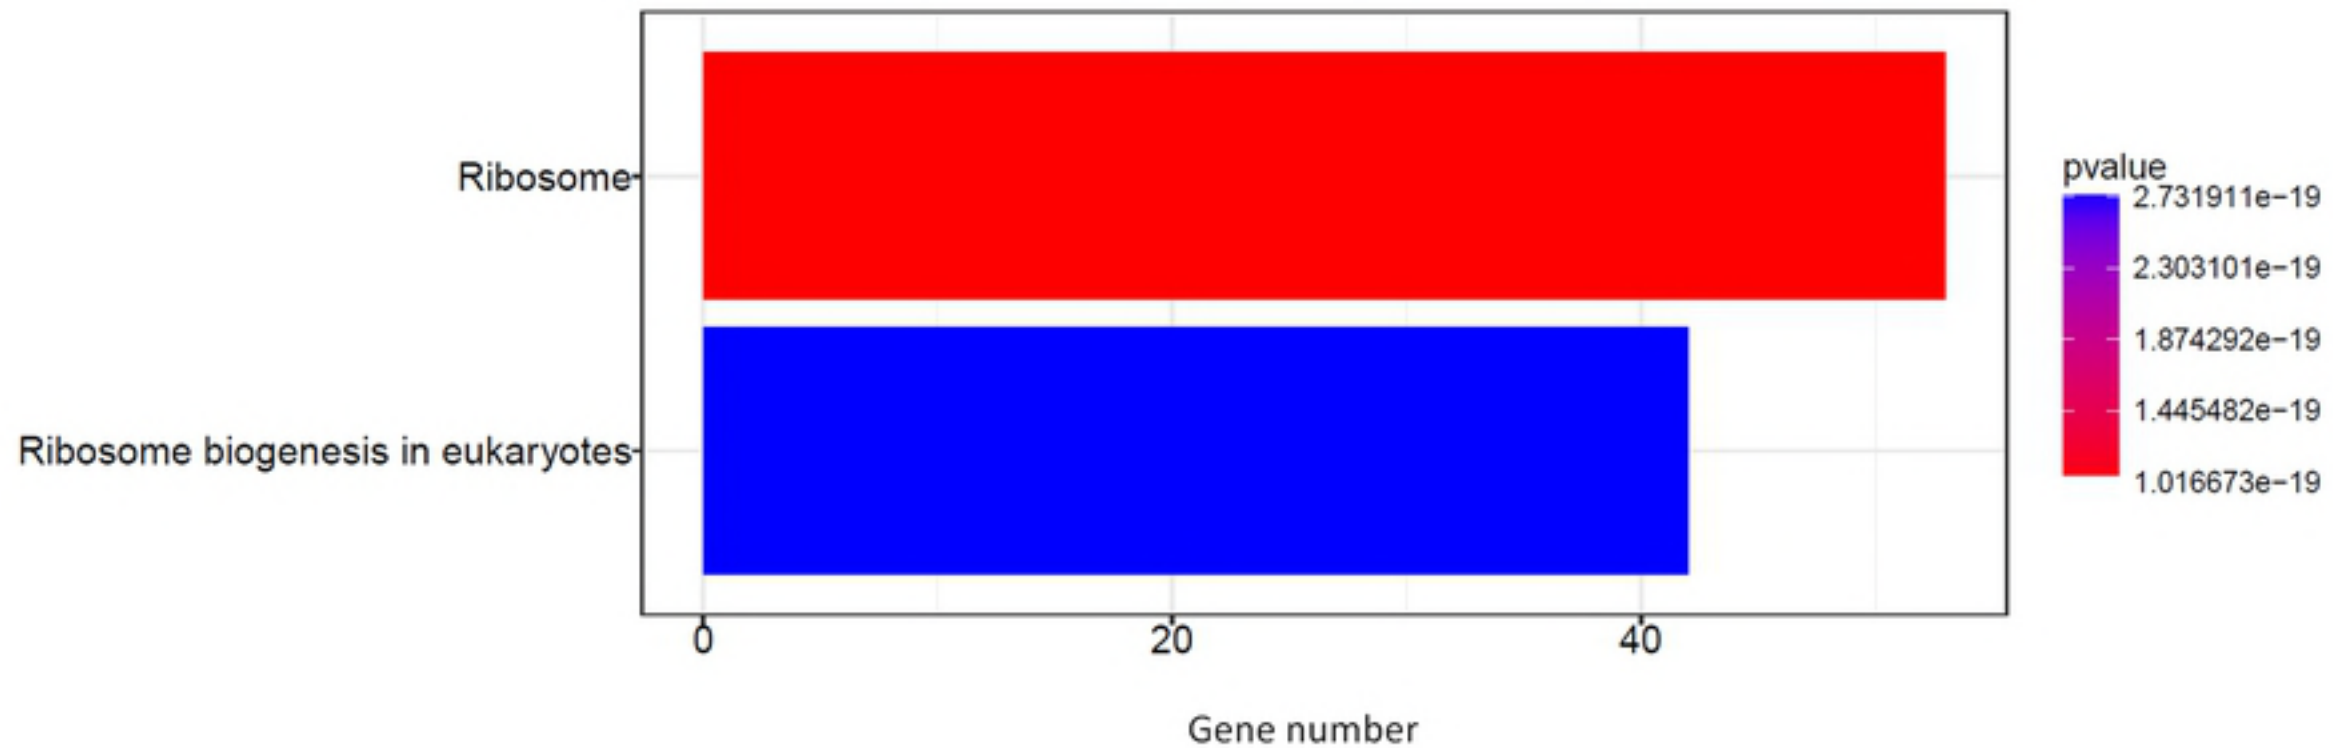

Source: https://www.biorxiv.org/content/10.1101/402784v1.full.pdf
